# Supplementary material for: Synthesis and biological evaluation of novel N-(piperazin-1-yl)alkyl-1H-dibenzo[a,c]carbazole derivatives of dehydroabietic acid as potential MEK inhibitors
Source: PubMed Central journal article supplement (PMC6720511; doi:10.1080/14756366.2019.1655407), 2019-08-25
Supplement: IENZ_A_1655407_SM1952.pdf [file IENZ_A_1655407_SM1952.pdf]

## Supplementary material

**Synthesis and biological evaluation of novel *N*-(piperazin-1-yl)alkyl-1*H*-dibenzo[*a,c*]carbazole derivatives of dehydroabietic acid as potential MEK inhibitors**

**Hao Chen, Chao Qiao, Ting-Ting Miao, A-Liang Li, Wen-Yan Wang, Wen Gu**

*Jiangsu Provincial Key Lab for the Chemistry and Utilization of Agro-forest Biomass, Jiangsu Key Lab of Biomass-based Green Fuels and Chemicals, Co-Innovation Center for Efficient Processing and Utilization of Forest Products, College of Chemical Engineering, Nanjing Forestry University, Nanjing 210037, P. R. China*

---

Corresponding author.

*Email address:* njguwen@163.com (W. Gu)

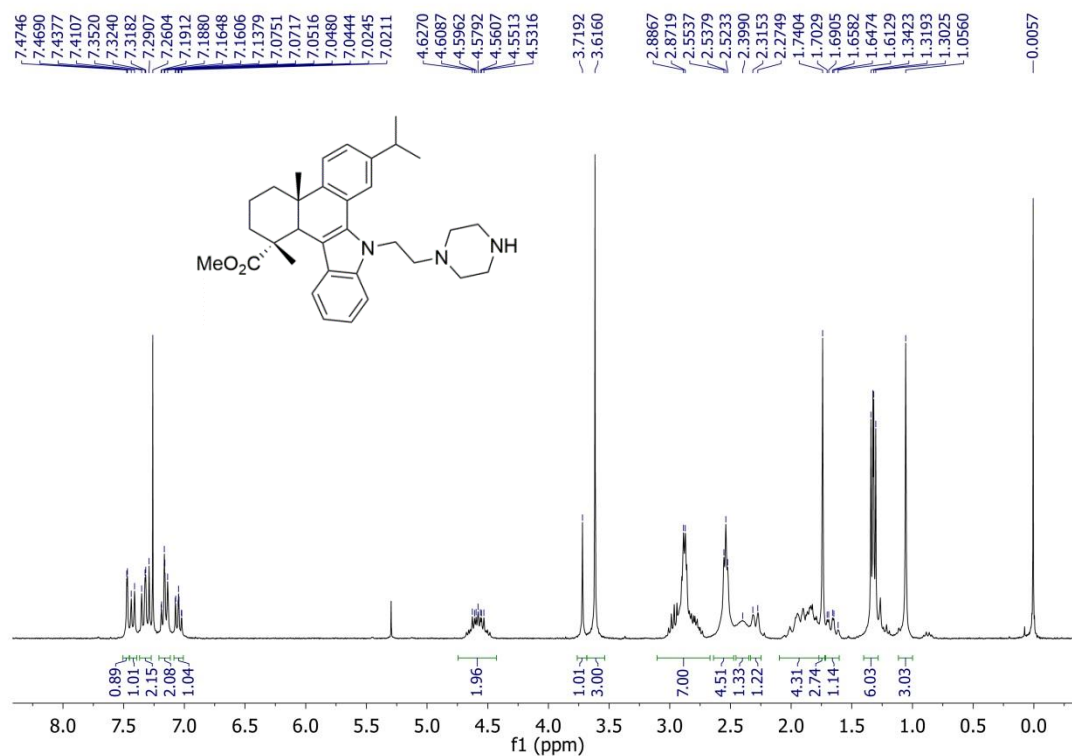

**Fig. S1.** <sup>1</sup>H-NMR spectrum of compound **6a** (300 MHz, CDCl<sub>3</sub>)

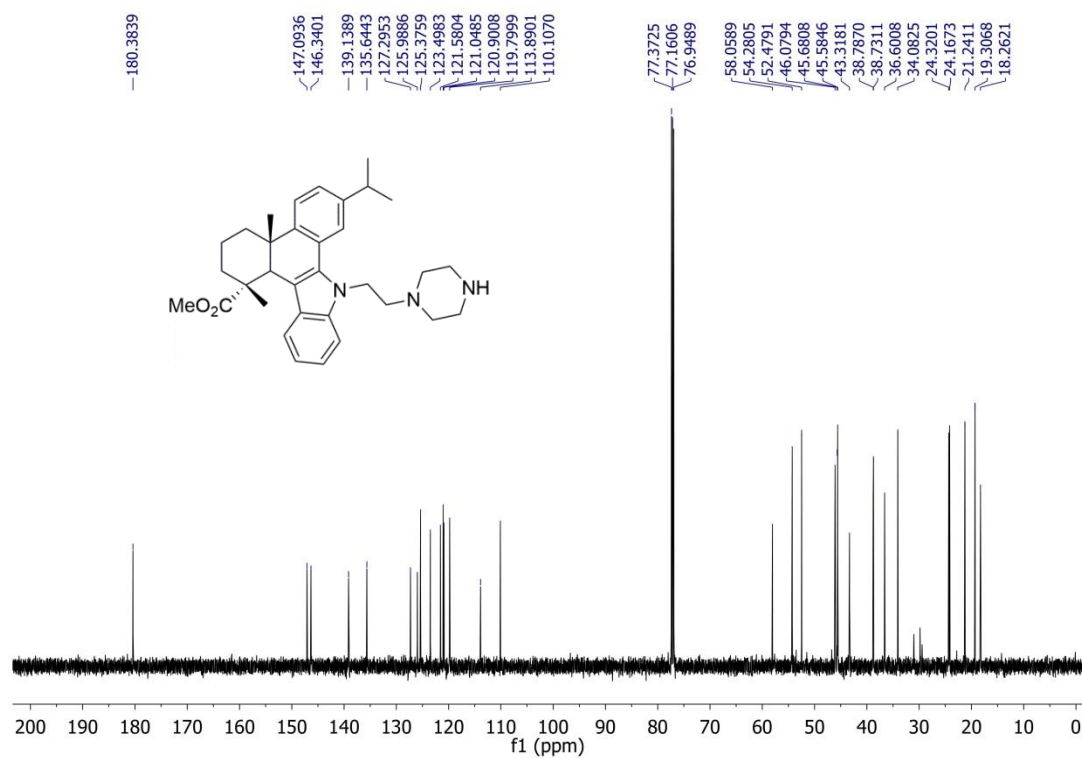

**Fig. S2.** <sup>13</sup>C-NMR spectrum of compound **6a** (150 MHz, CDCl<sub>3</sub>)

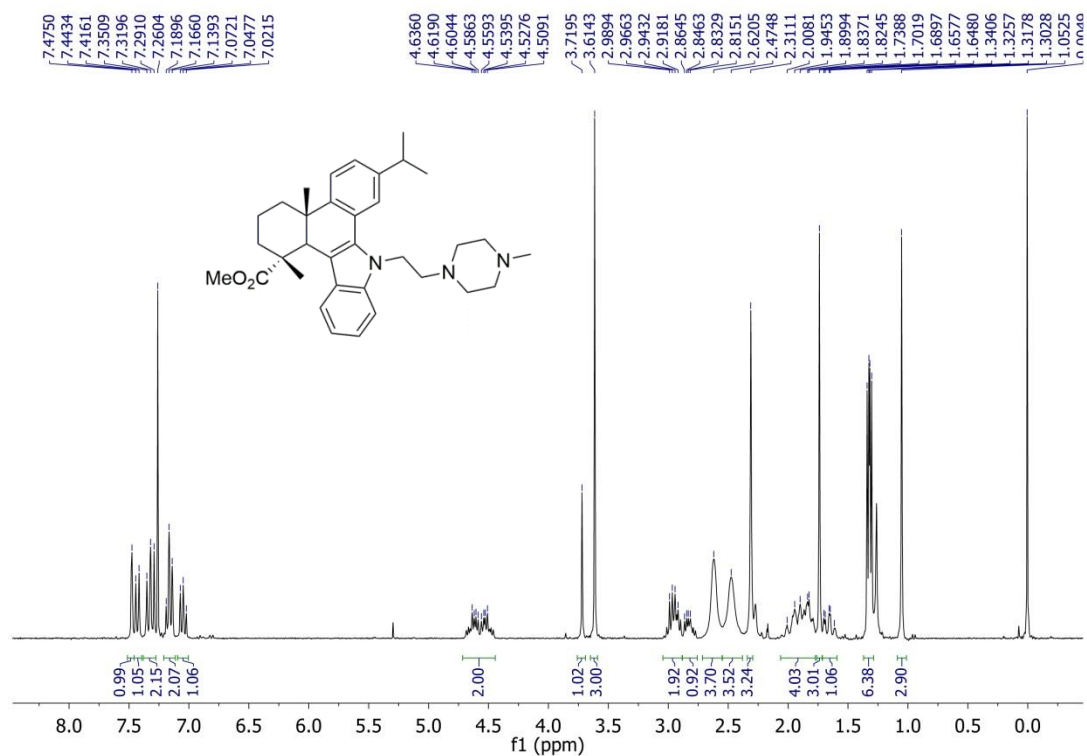

Fig. S3. <sup>1</sup>H-NMR spectrum of compound **6b** (300 MHz, CDCl<sub>3</sub>)

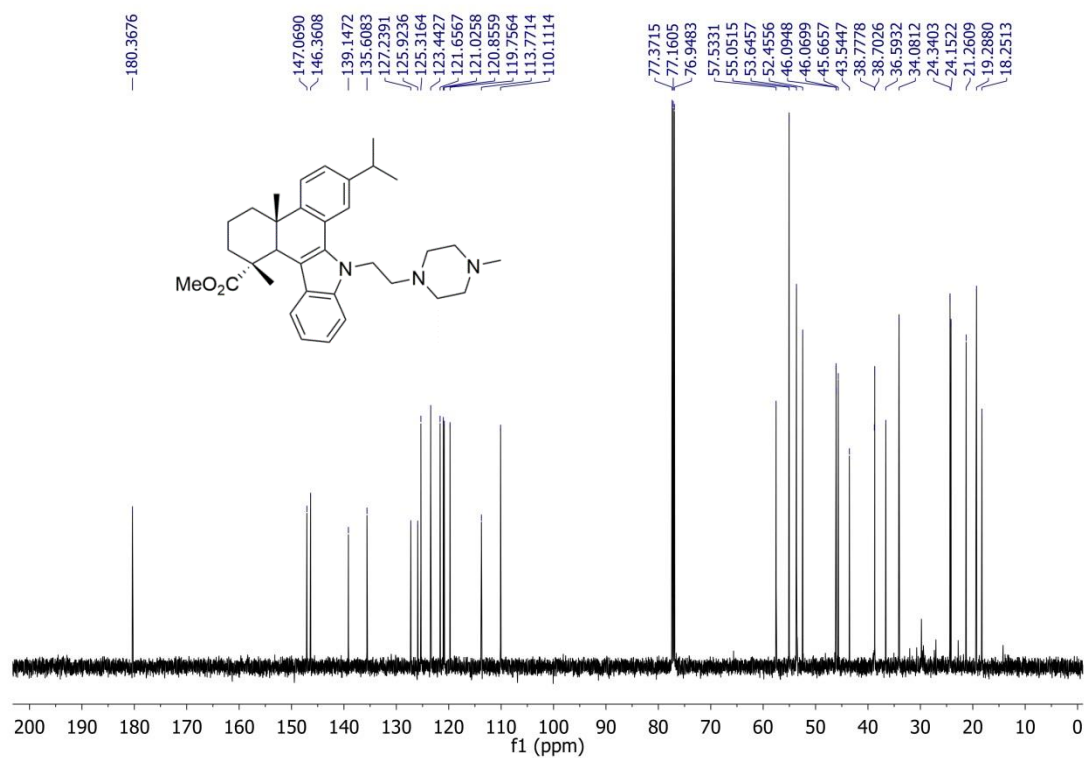

Fig. S4. <sup>13</sup>C-NMR spectrum of compound **6b** (150 MHz, CDCl<sub>3</sub>)

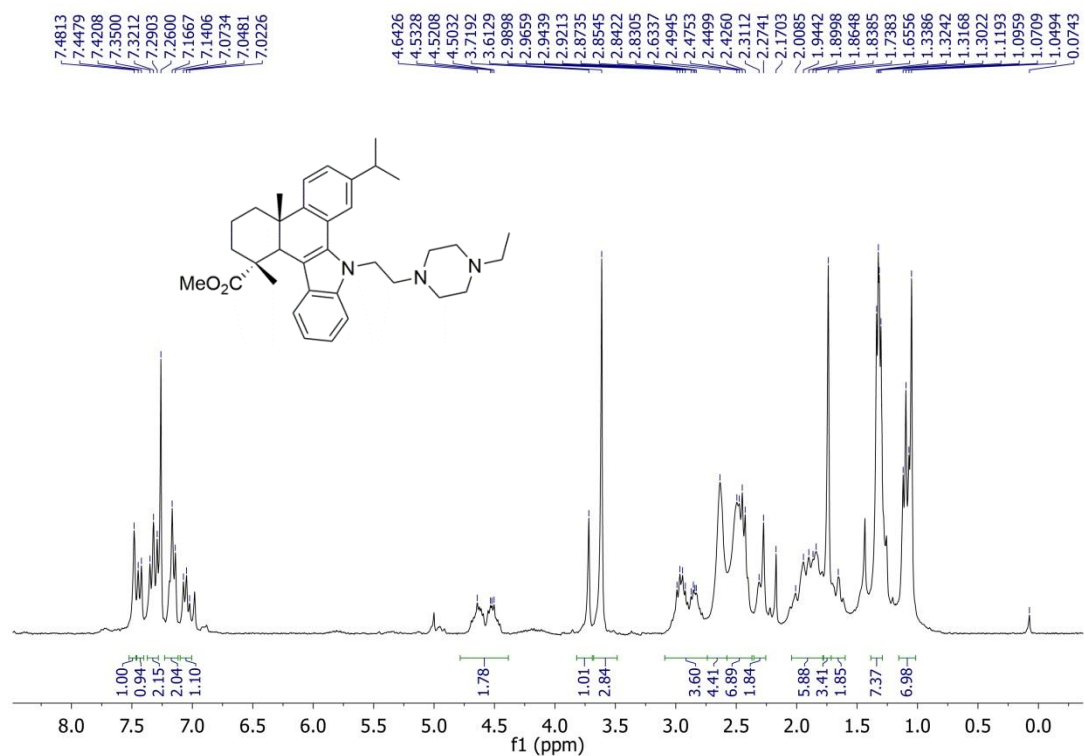

Fig. S5. <sup>1</sup>H-NMR spectrum of compound **6c** (300 MHz, CDCl<sub>3</sub>)

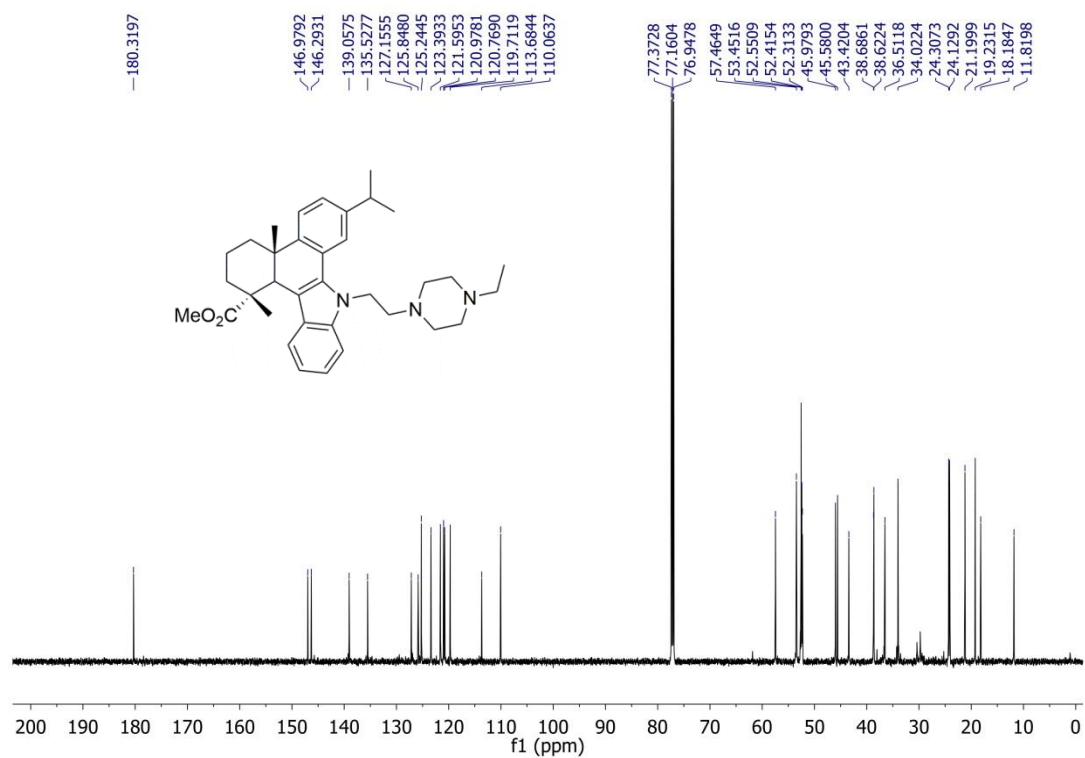

Fig. S6. <sup>13</sup>C-NMR spectrum of compound **6c** (150 MHz, CDCl<sub>3</sub>)

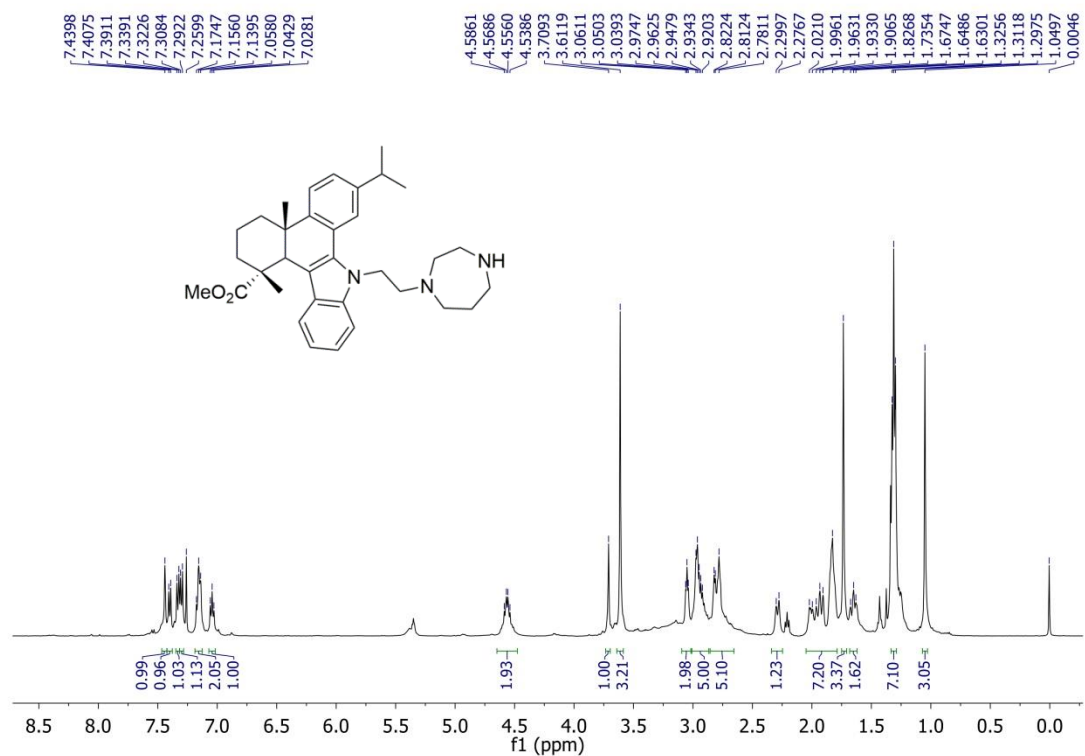

Fig. S7. <sup>1</sup>H-NMR spectrum of compound **6d** (500 MHz, CDCl<sub>3</sub>)

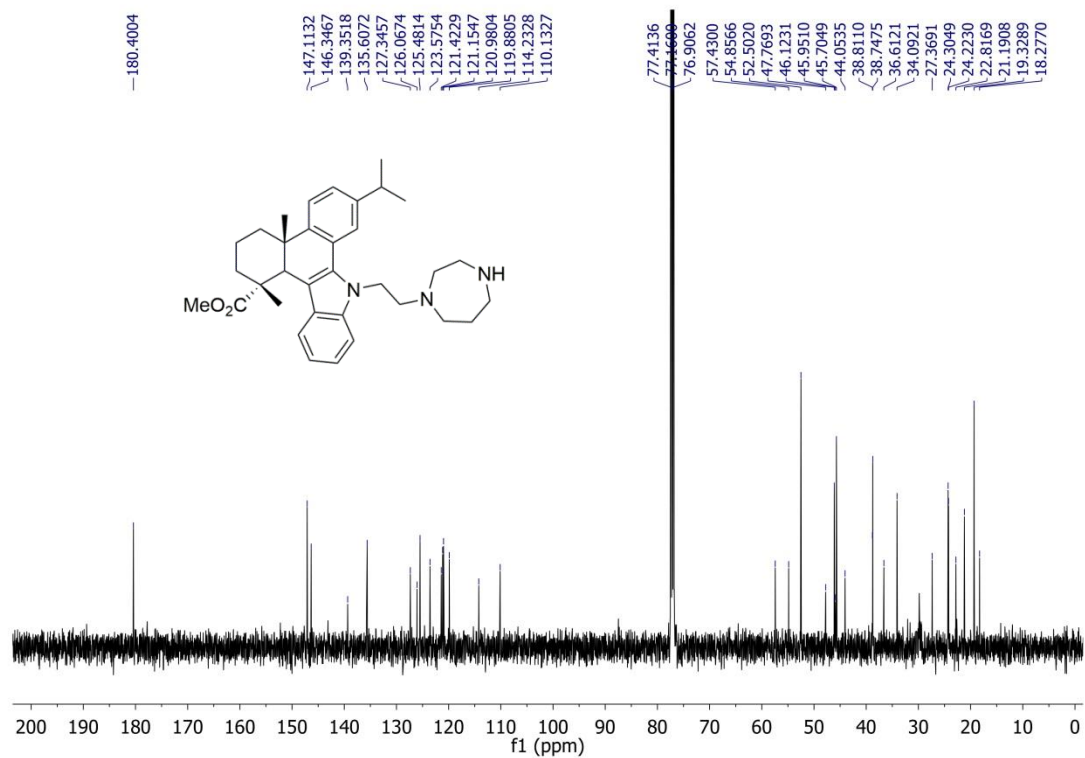

Fig. S8. <sup>13</sup>C-NMR spectrum of compound **6d** (125 MHz, CDCl<sub>3</sub>)

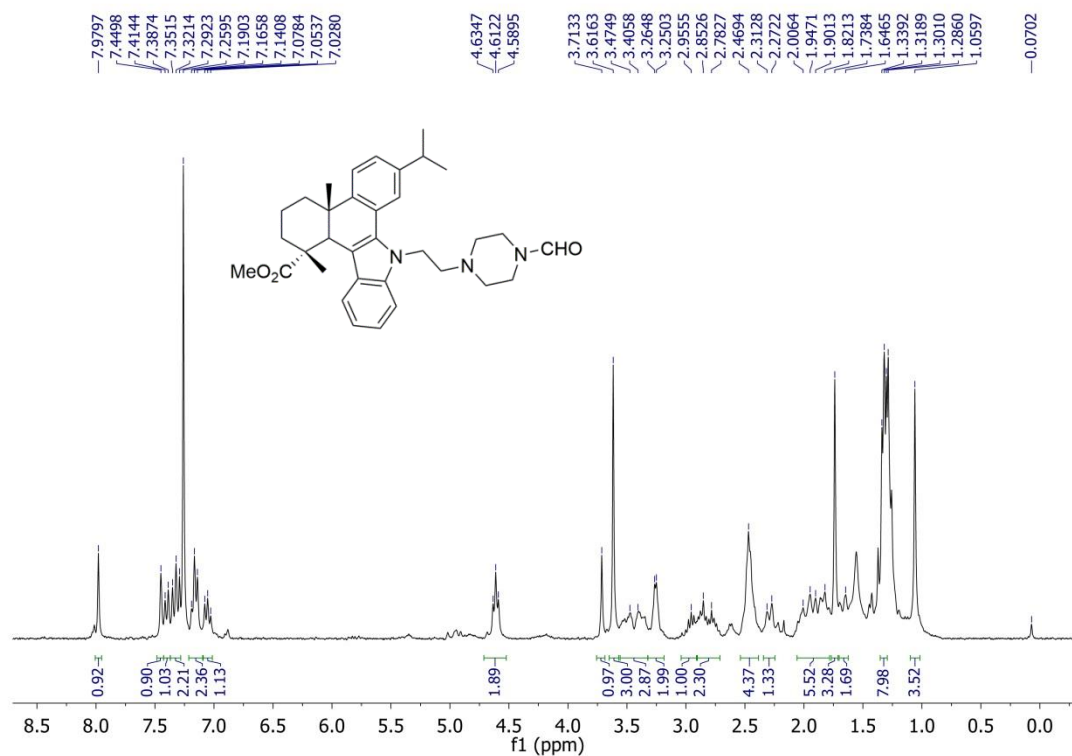

**Fig. S9.** <sup>1</sup>H-NMR spectrum of compound **6e** (300 MHz, CDCl<sub>3</sub>)

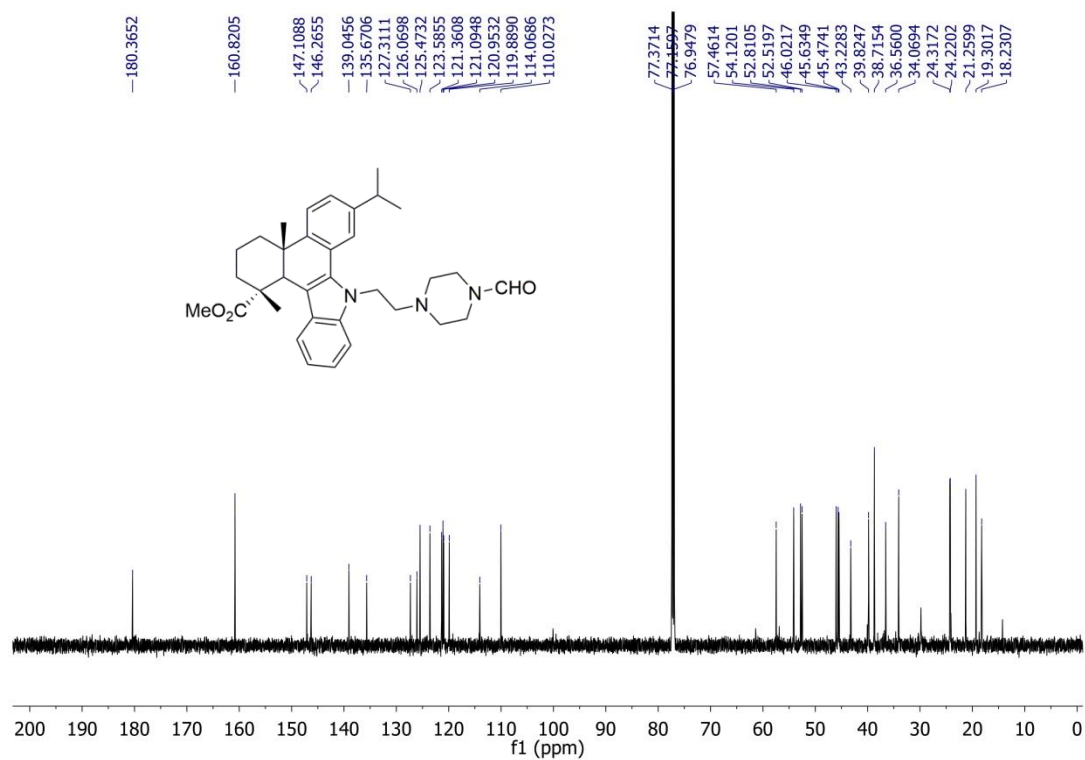

**Fig. S10.** <sup>13</sup>C-NMR spectrum of compound **6e** (150 MHz, CDCl<sub>3</sub>)

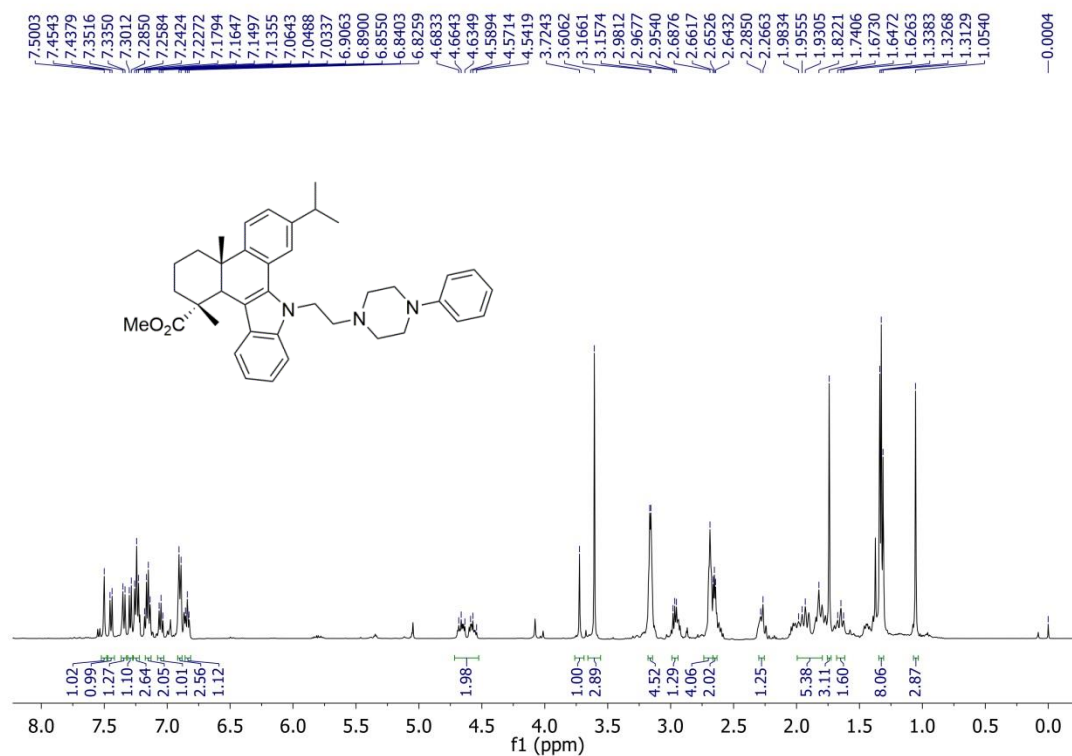

**Fig. S11.** <sup>1</sup>H-NMR spectrum of compound **6f** (500 MHz, CDCl<sub>3</sub>)

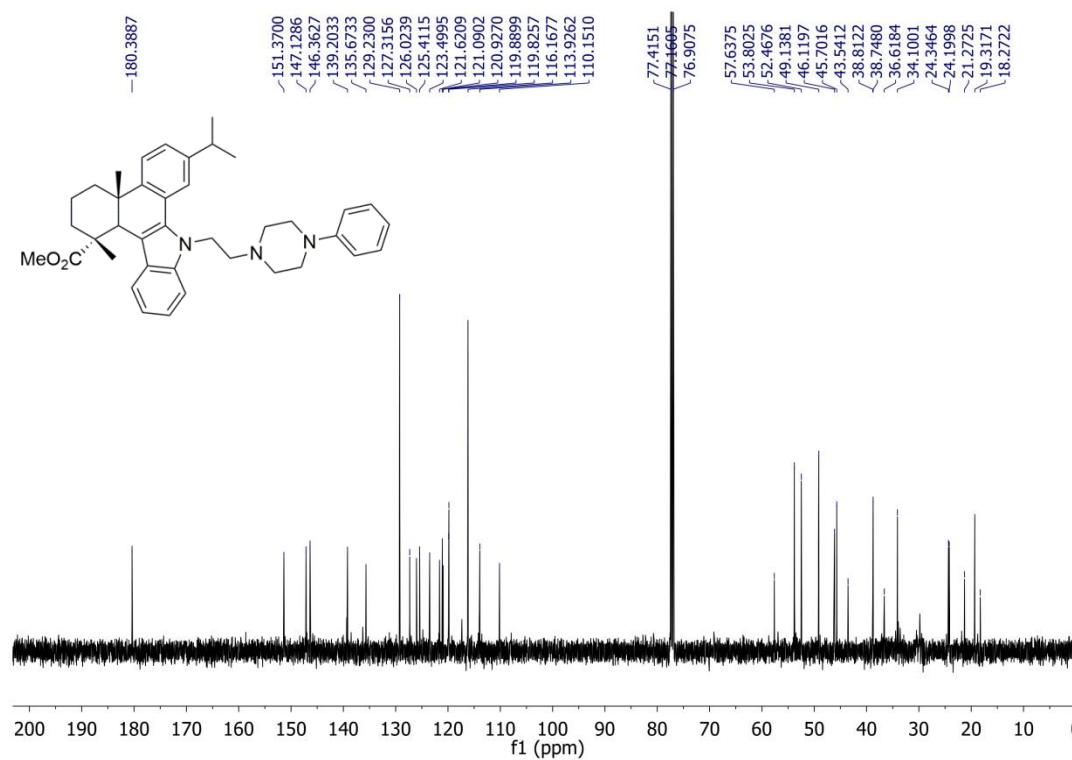

**Fig. S12.** <sup>13</sup>C-NMR spectrum of compound **6f** (125 MHz, CDCl<sub>3</sub>)



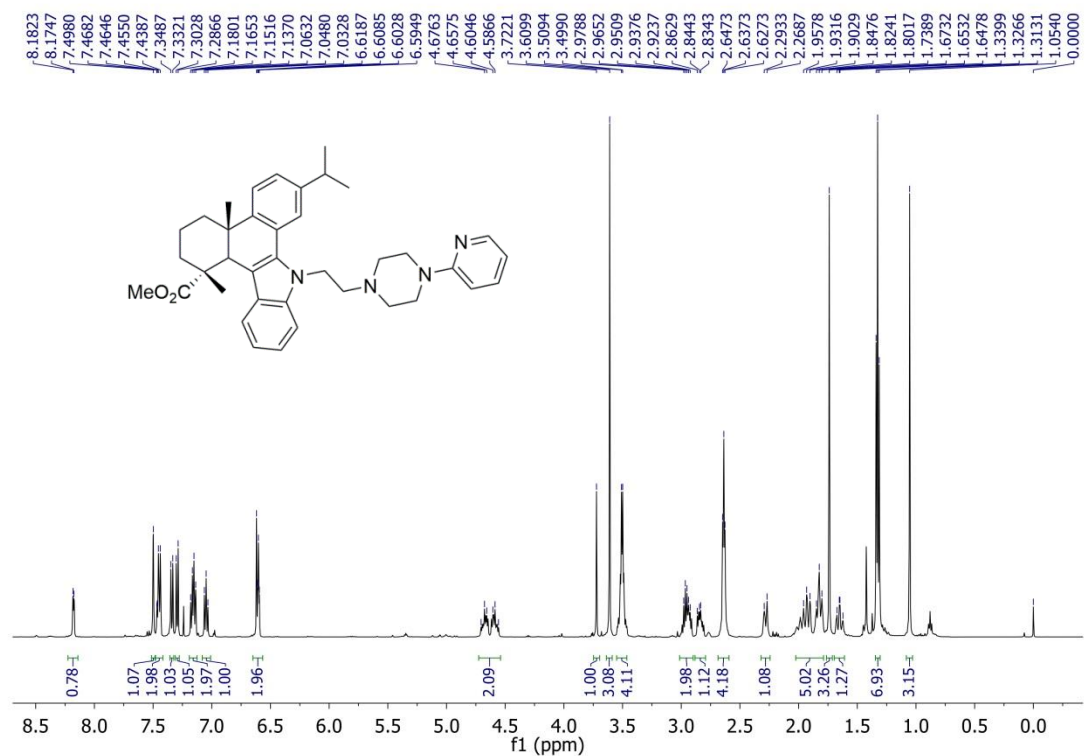

Fig. S13. <sup>1</sup>H-NMR spectrum of compound **6g** (500 MHz, CDCl<sub>3</sub>)

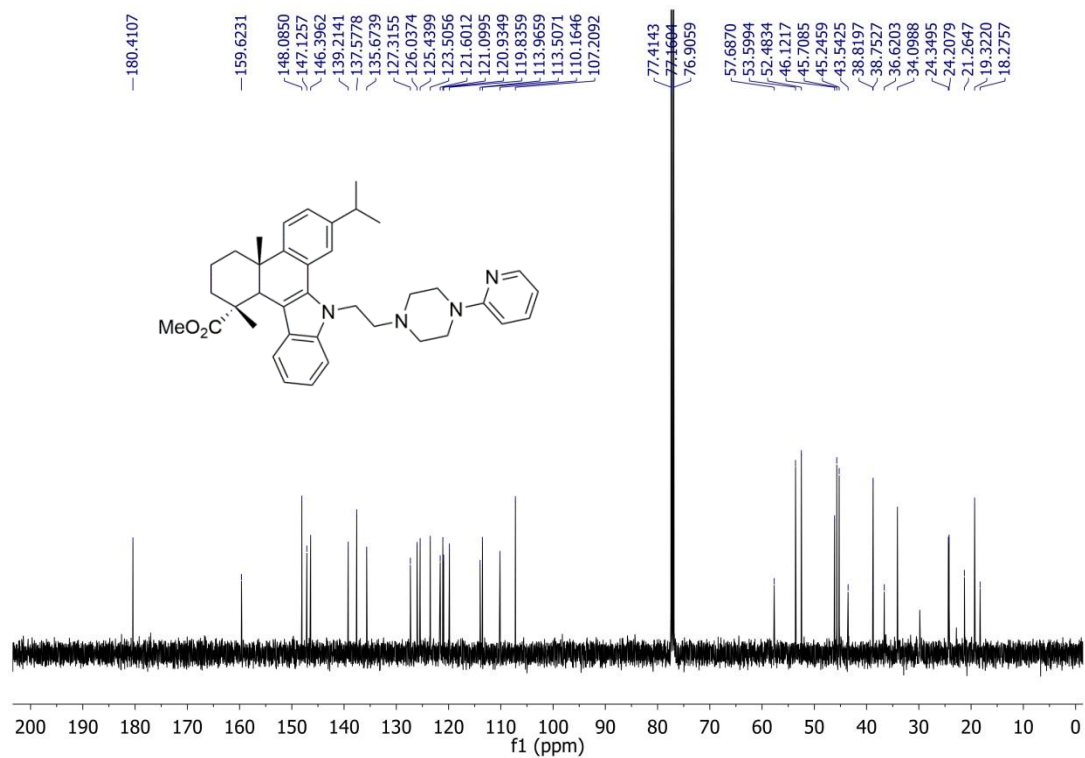

Fig. S14. <sup>13</sup>C-NMR spectrum of compound **6g** (125 MHz, CDCl<sub>3</sub>)



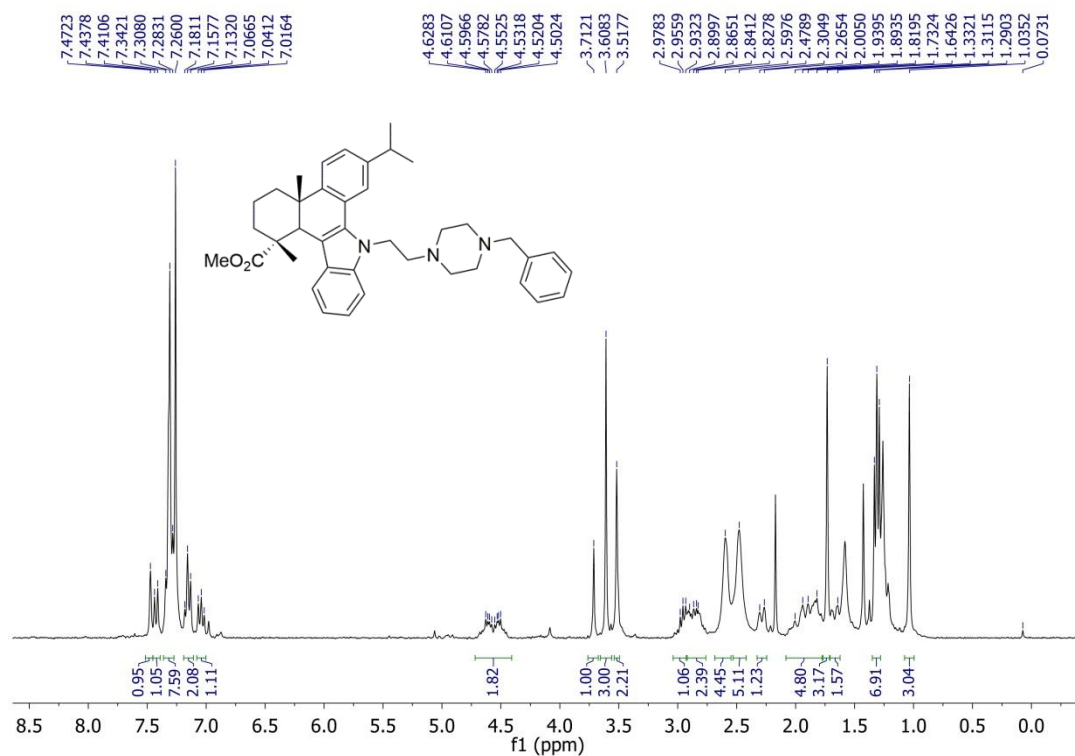

**Fig. S15.** <sup>1</sup>H-NMR spectrum of compound **6h** (300 MHz, CDCl<sub>3</sub>)

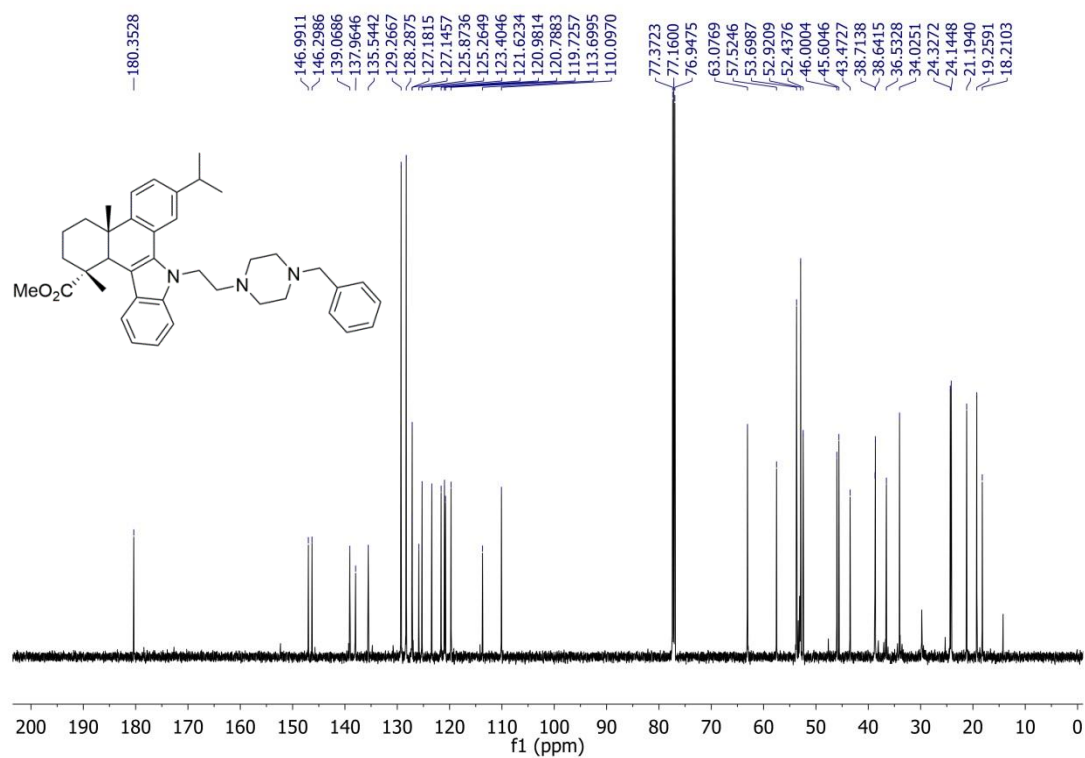

**Fig. S16.** <sup>13</sup>C-NMR spectrum of compound **6h** (150 MHz, CDCl<sub>3</sub>)

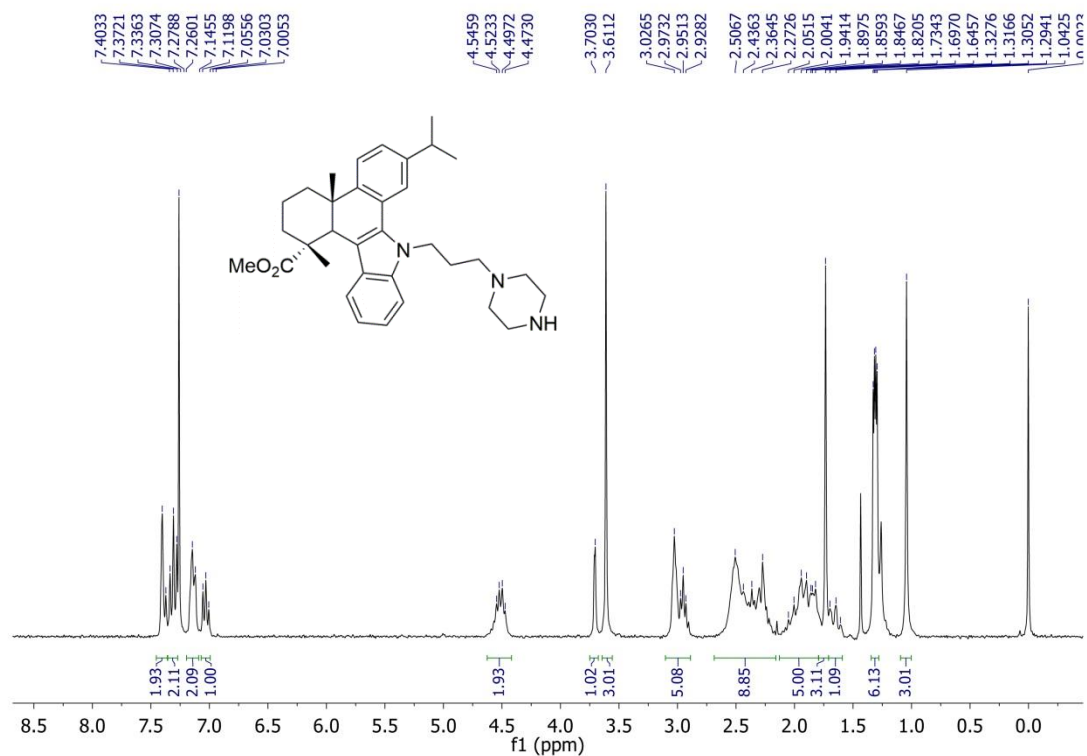

Fig. S17. <sup>1</sup>H-NMR spectrum of compound 7a (300 MHz, CDCl<sub>3</sub>)

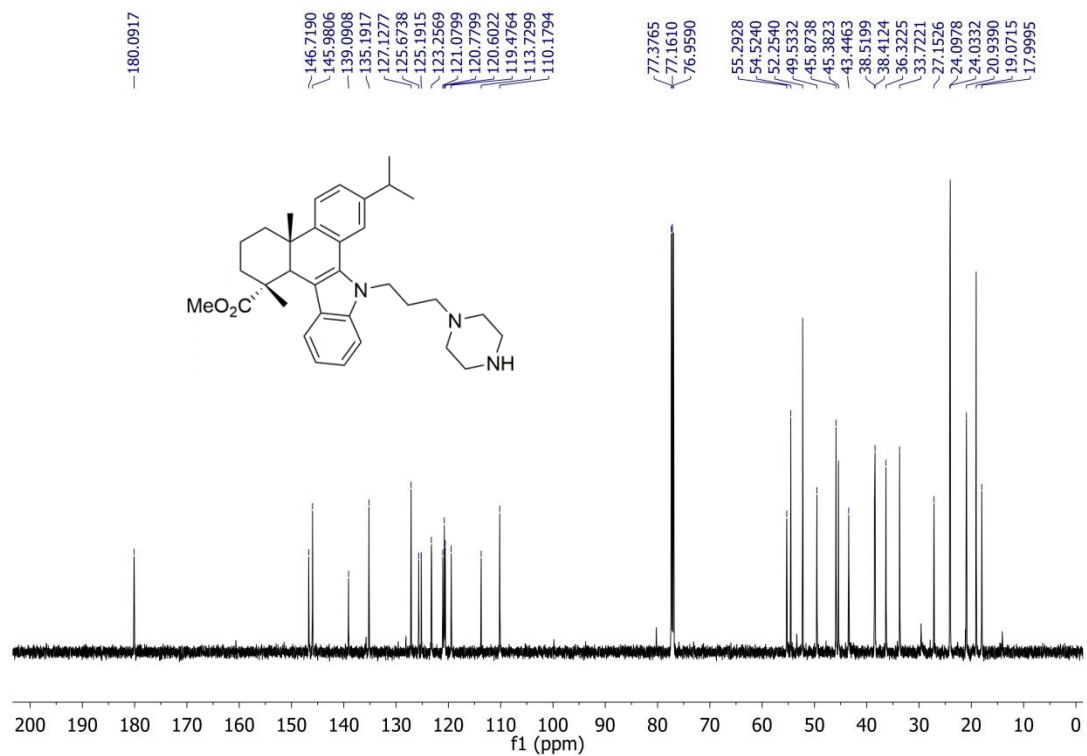

Fig. S18. <sup>13</sup>C-NMR spectrum of compound 7a (150 MHz, CDCl<sub>3</sub>)

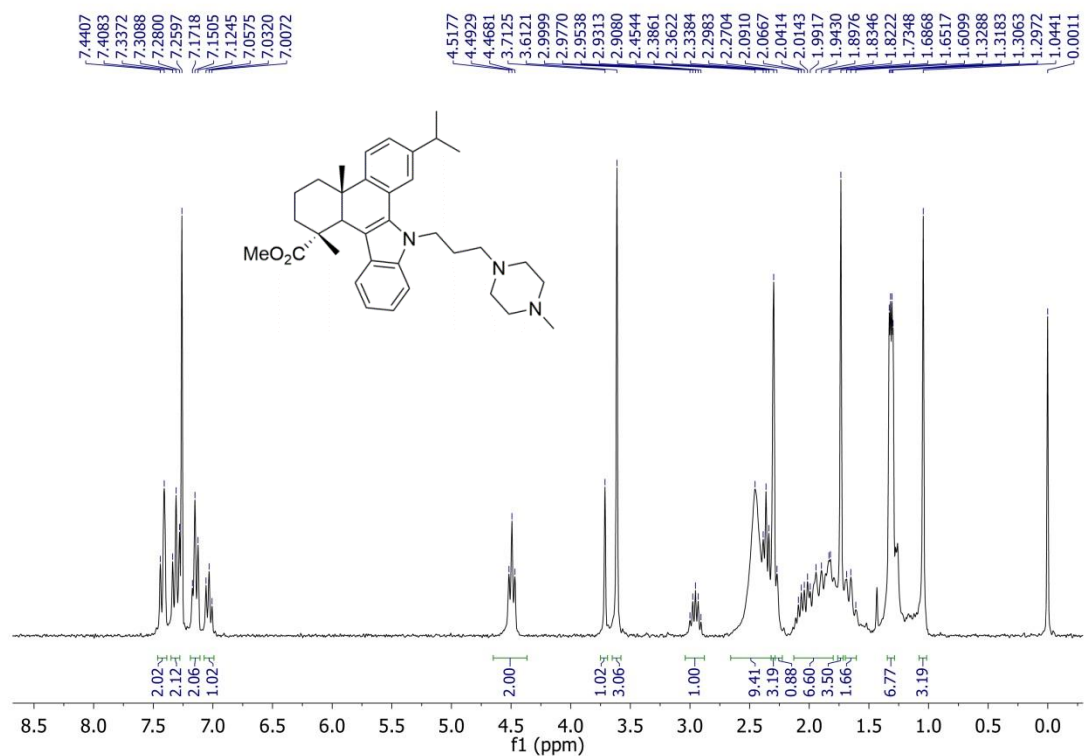

Fig. S19. <sup>1</sup>H-NMR spectrum of compound **7b** (300 MHz, CDCl<sub>3</sub>)

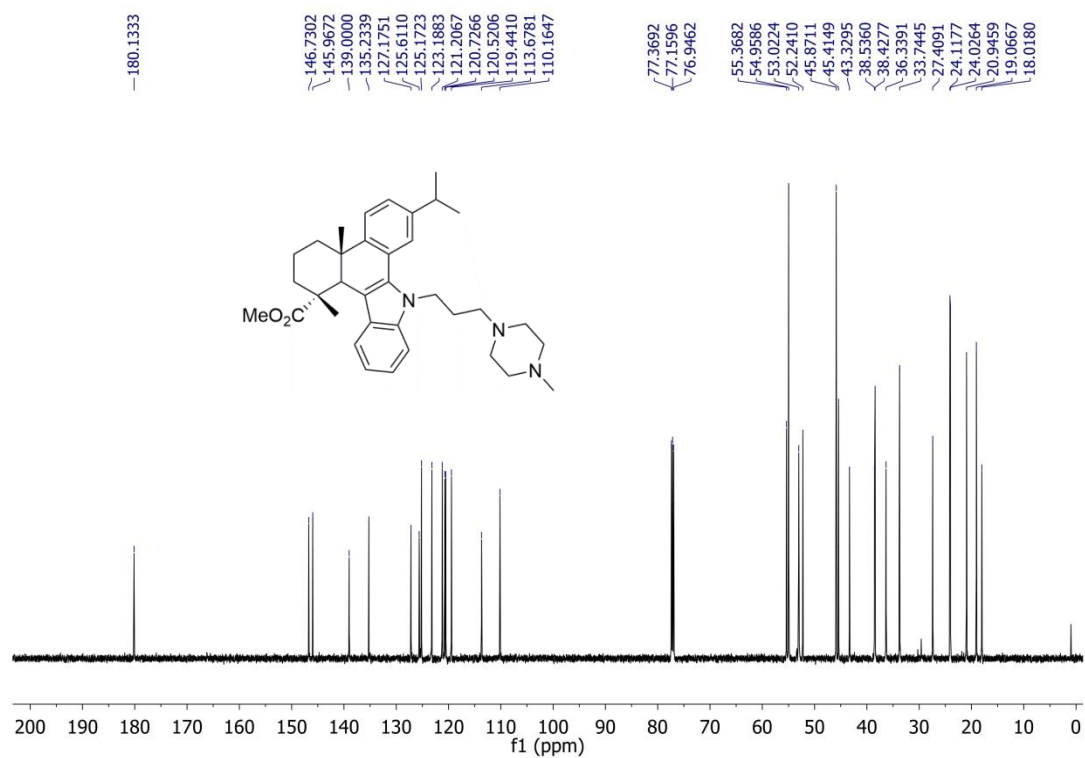

Fig. S20. <sup>13</sup>C-NMR spectrum of compound **7b** (150 MHz, CDCl<sub>3</sub>)

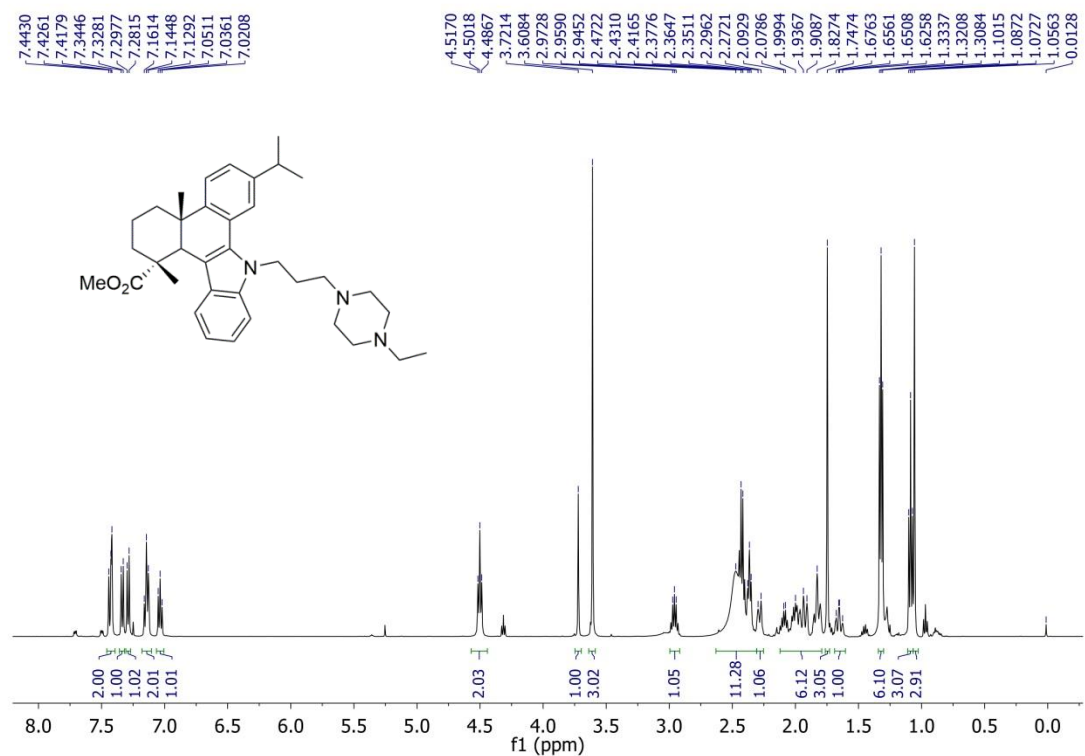

Fig. S21. <sup>1</sup>H-NMR spectrum of compound 7c (500 MHz, CDCl<sub>3</sub>)

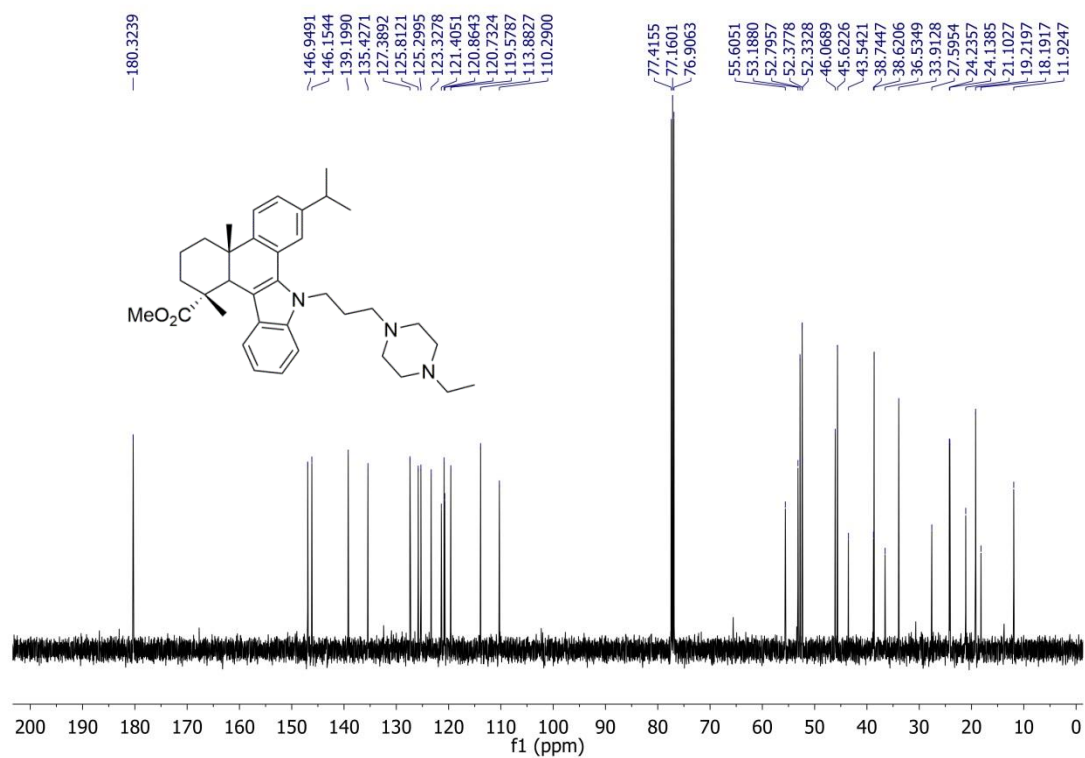

Fig. S22. <sup>13</sup>C-NMR spectrum of compound 7c (125 MHz, CDCl<sub>3</sub>)

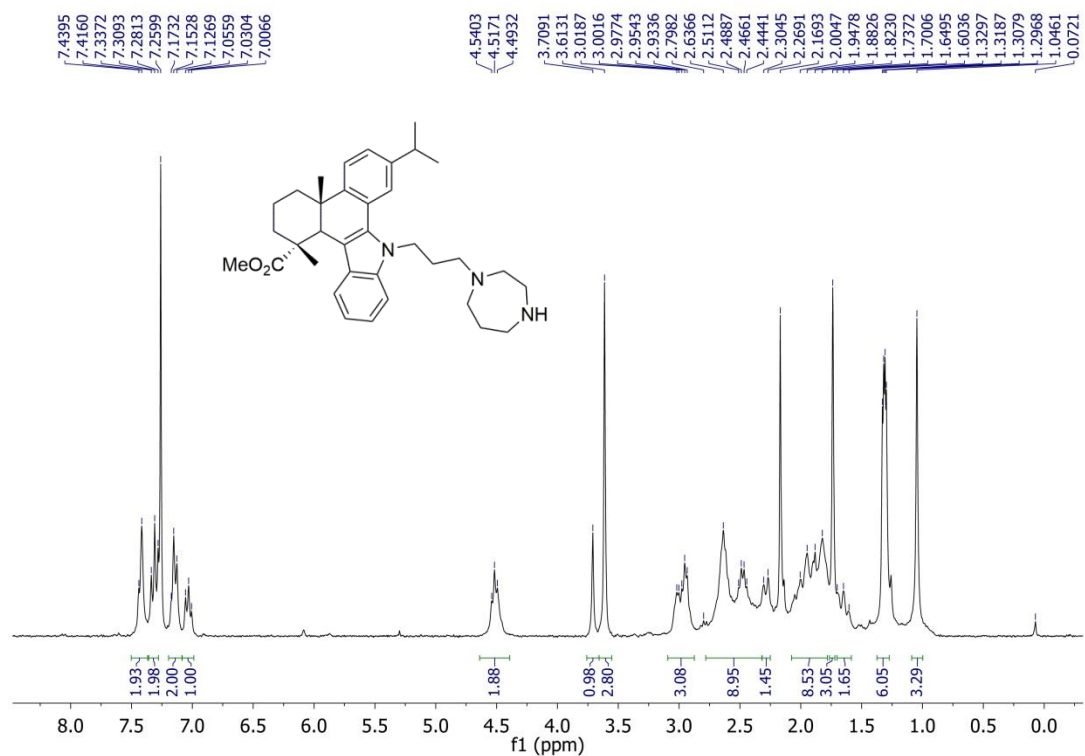

Fig. S23. <sup>1</sup>H-NMR spectrum of compound 7d (300 MHz, CDCl<sub>3</sub>)

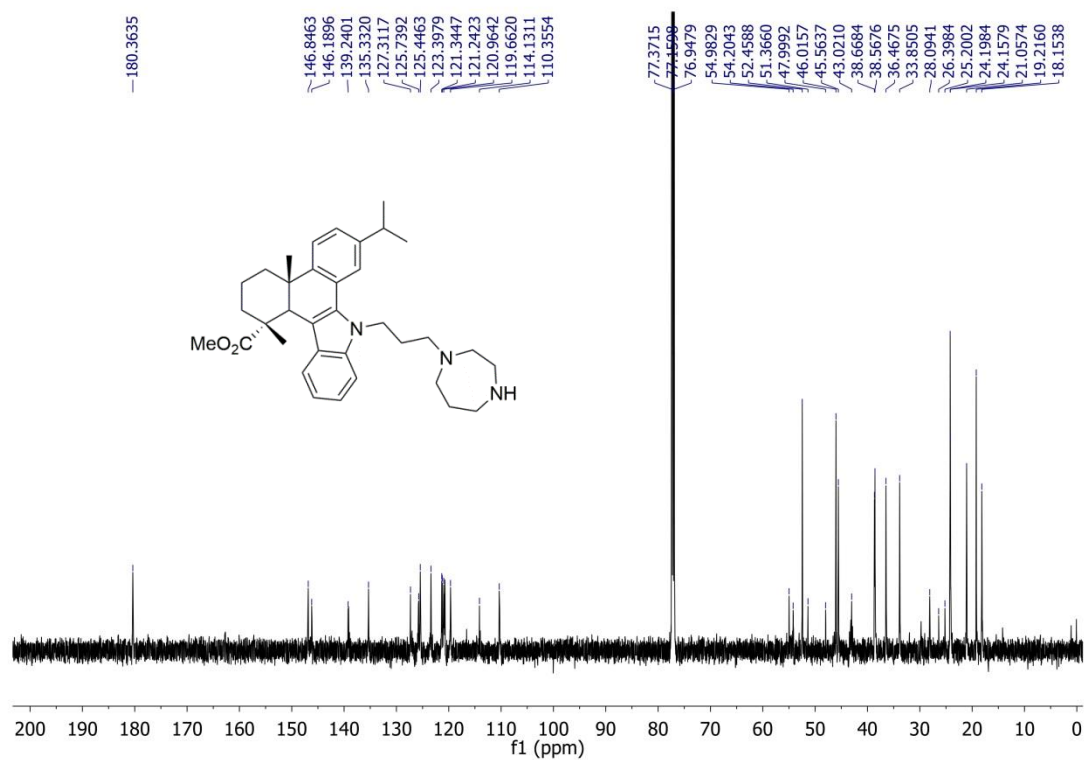

Fig. S24. <sup>13</sup>C-NMR spectrum of compound 7d (150 MHz, CDCl<sub>3</sub>)

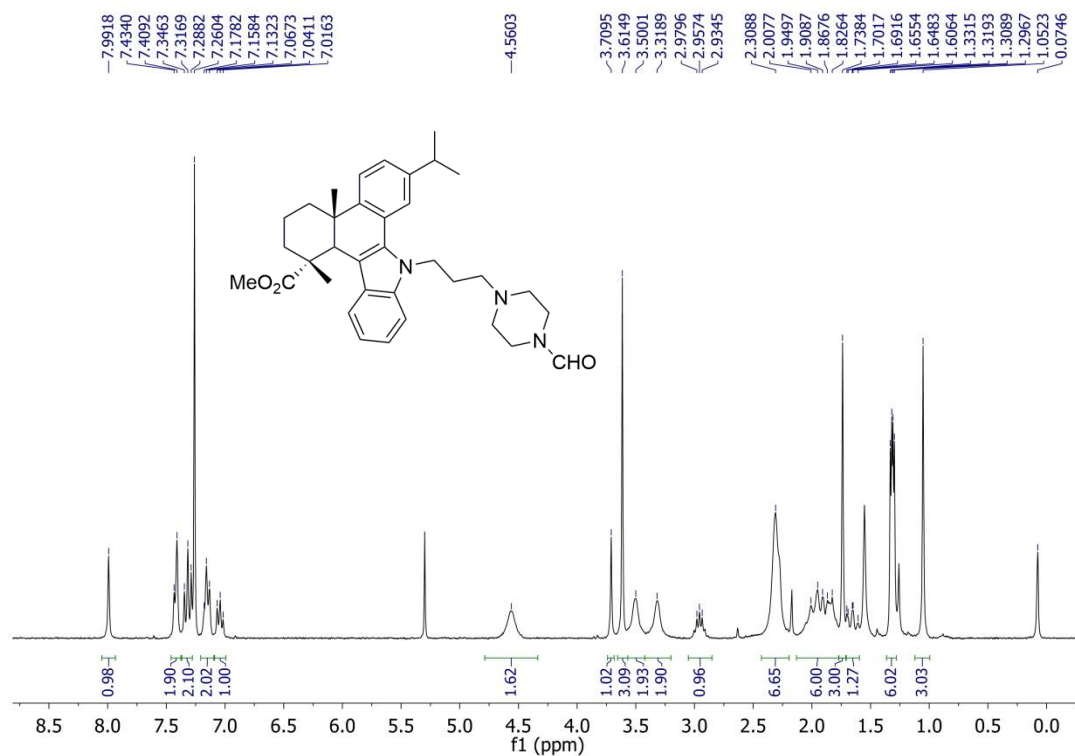

Fig. S25. <sup>1</sup>H-NMR spectrum of compound 7e (300 MHz, CDCl<sub>3</sub>)

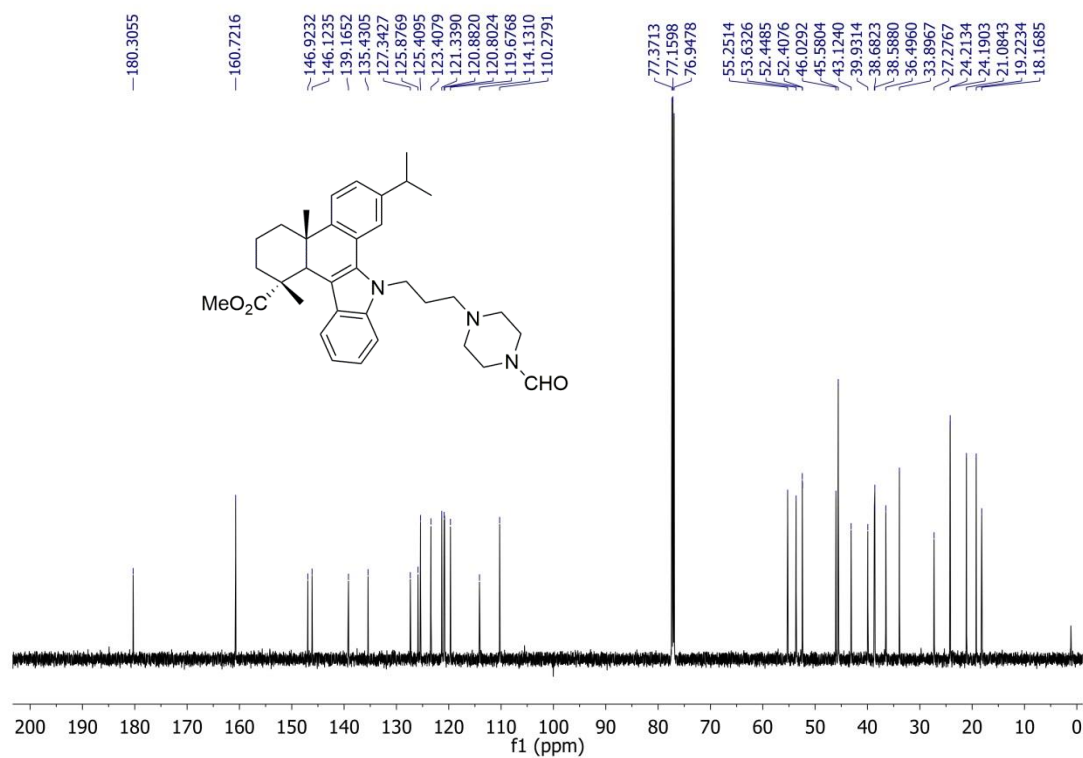

Fig. S26. <sup>13</sup>C-NMR spectrum of compound 7e (150 MHz, CDCl<sub>3</sub>)

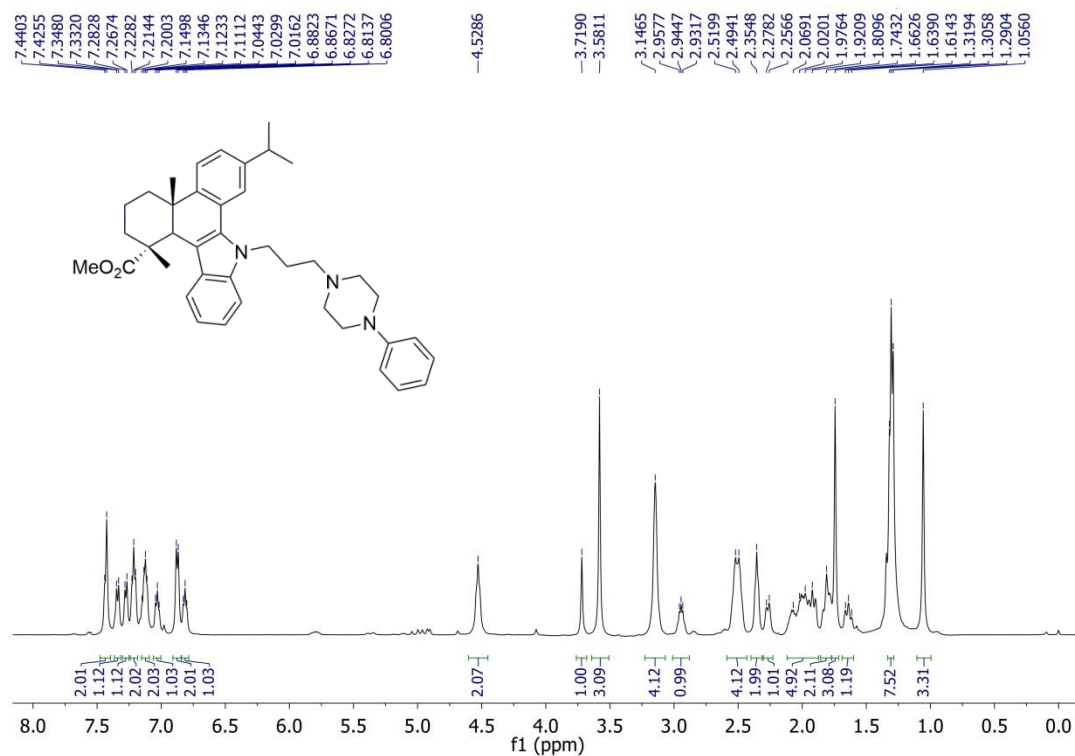

Fig. S27. <sup>1</sup>H-NMR spectrum of compound **7f** (500 MHz, CDCl<sub>3</sub>)

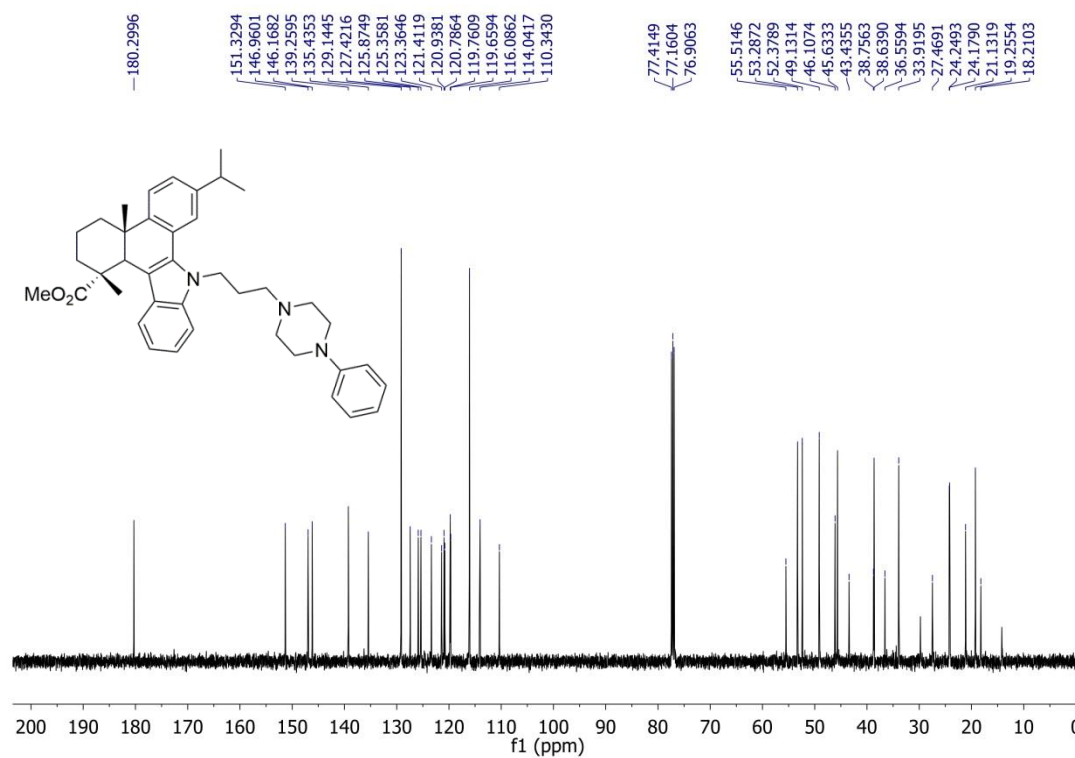

Fig. S28. <sup>13</sup>C-NMR spectrum of compound **7f** (125 MHz, CDCl<sub>3</sub>)



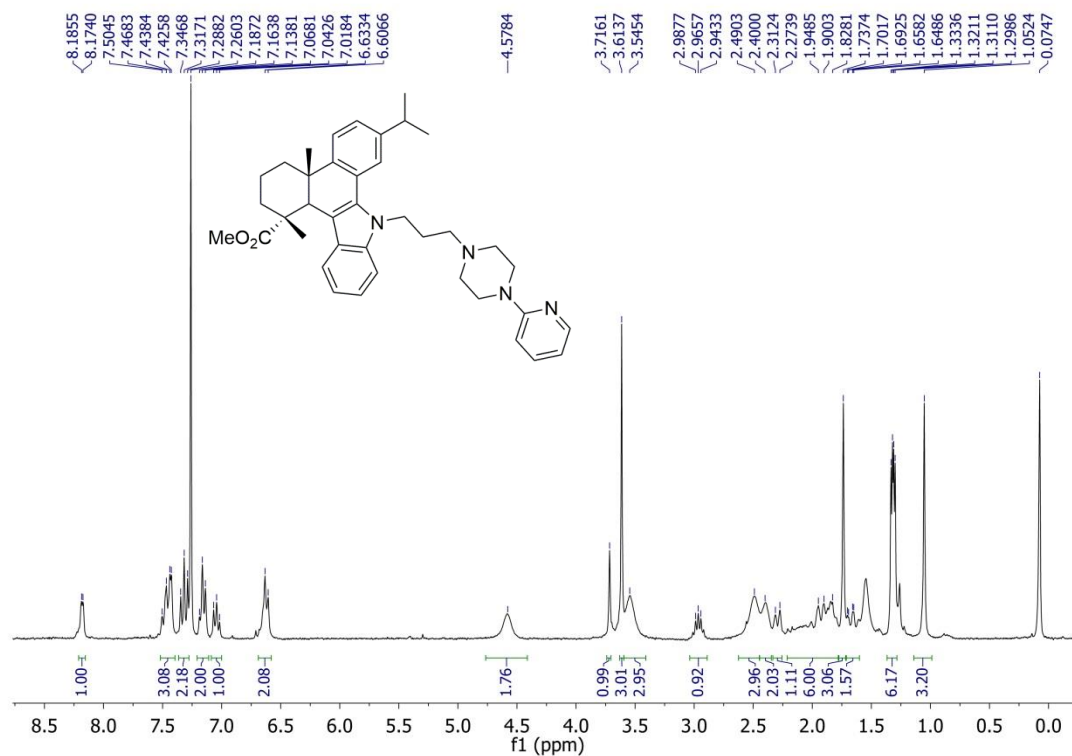

Fig. S29. <sup>1</sup>H-NMR spectrum of compound 7g (300 MHz, CDCl<sub>3</sub>)

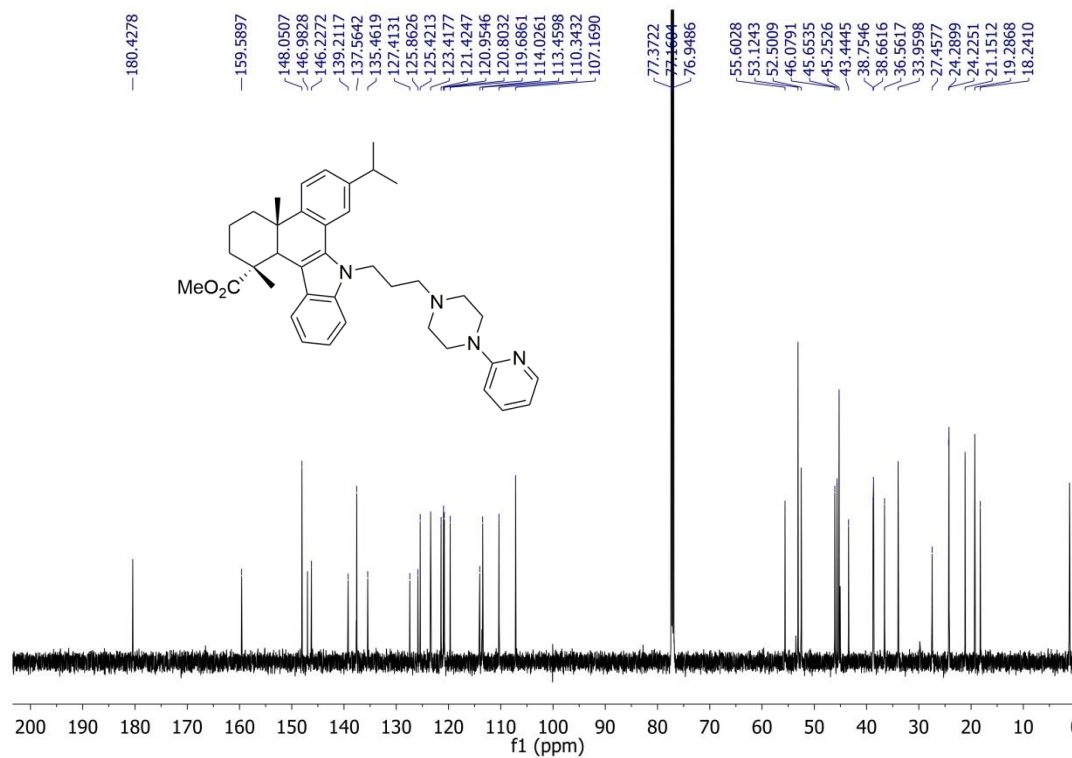

Fig. S30. <sup>13</sup>C-NMR spectrum of compound 7g (150 MHz, CDCl<sub>3</sub>)

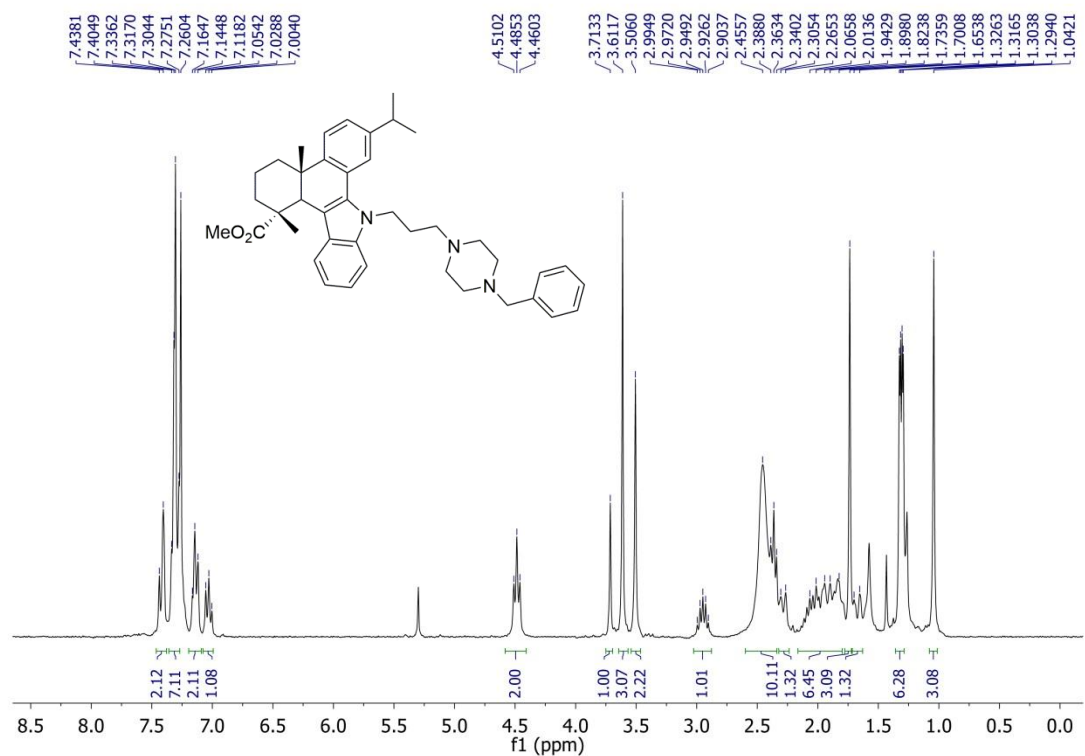

**Fig. S31.** <sup>1</sup>H-NMR spectrum of compound **7h** (300 MHz, CDCl<sub>3</sub>)

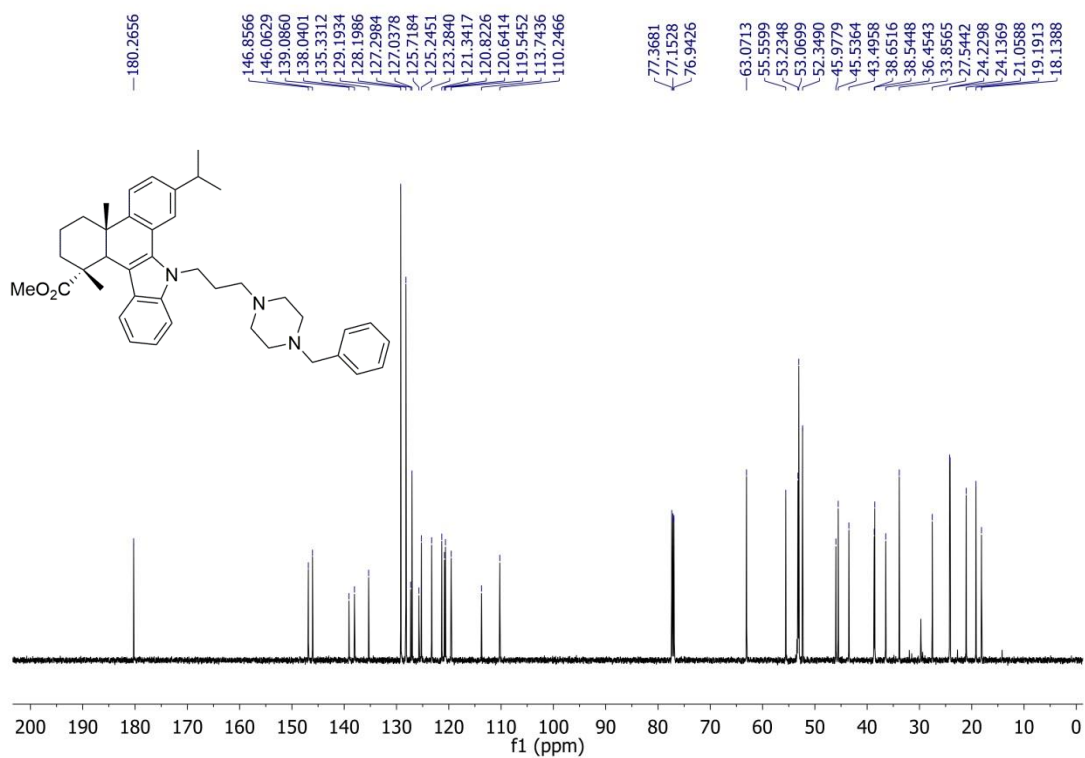

**Fig. S32.** <sup>13</sup>C-NMR spectrum of compound **7h** (150 MHz, CDCl<sub>3</sub>)

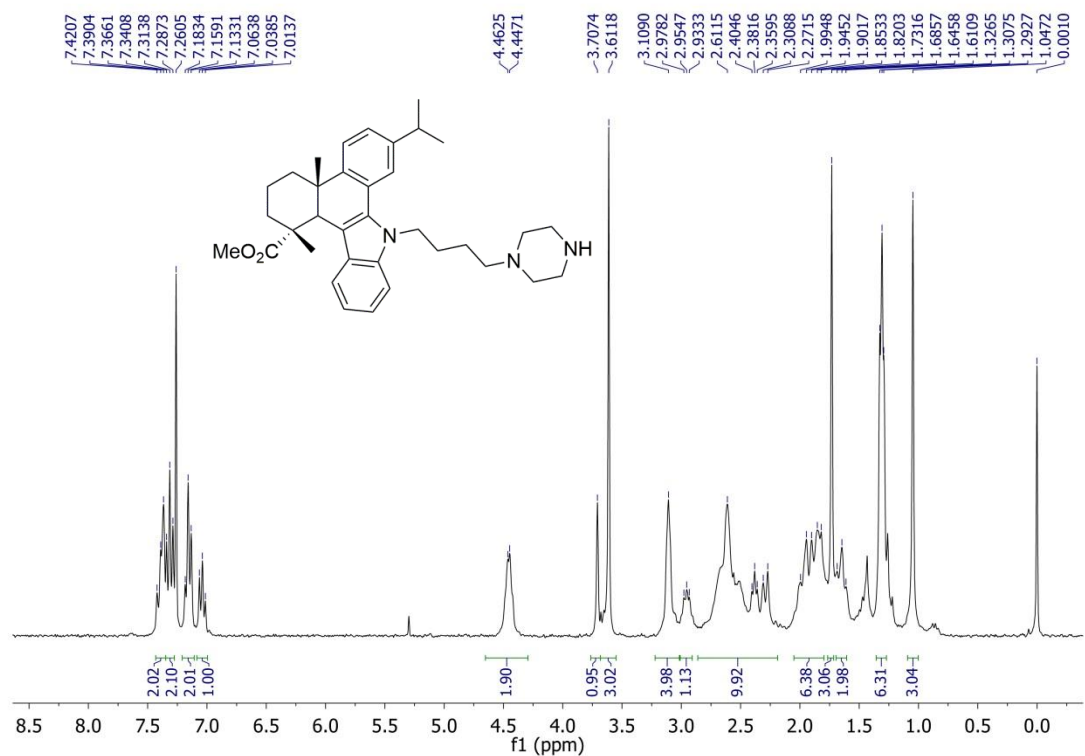

**Fig. S33.** <sup>1</sup>H-NMR spectrum of compound **8a** (300 MHz, CDCl<sub>3</sub>)

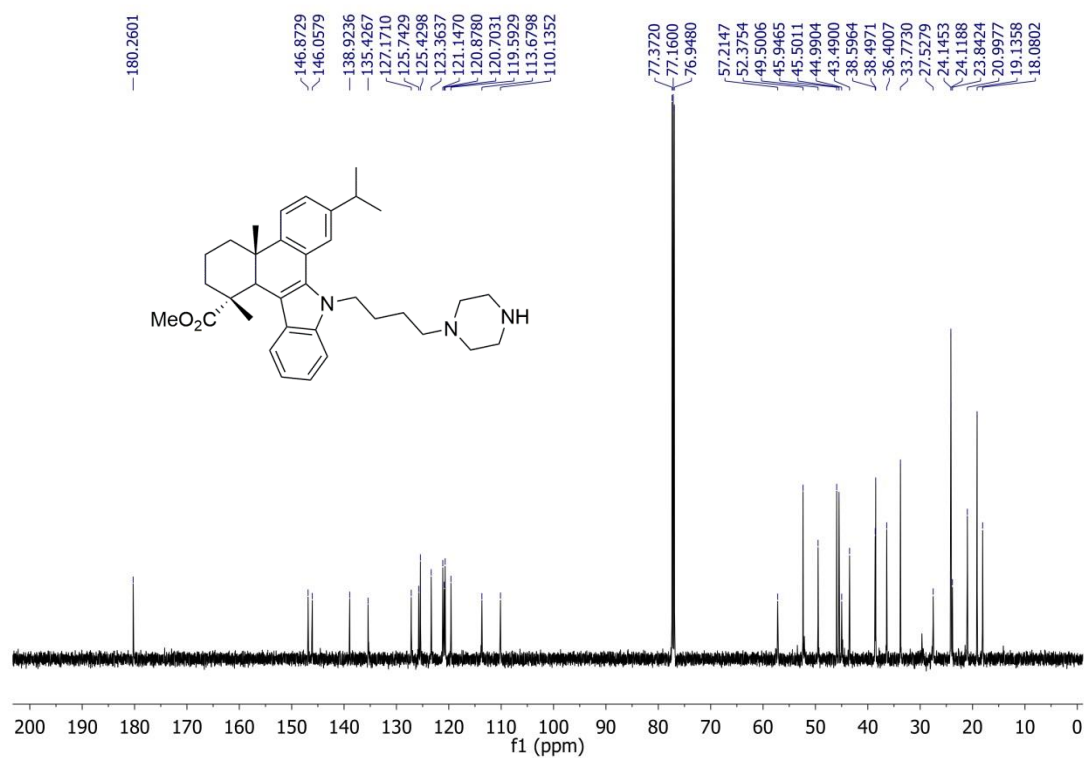

**Fig. S34.** <sup>13</sup>C-NMR spectrum of compound **8a** (150 MHz, CDCl<sub>3</sub>)

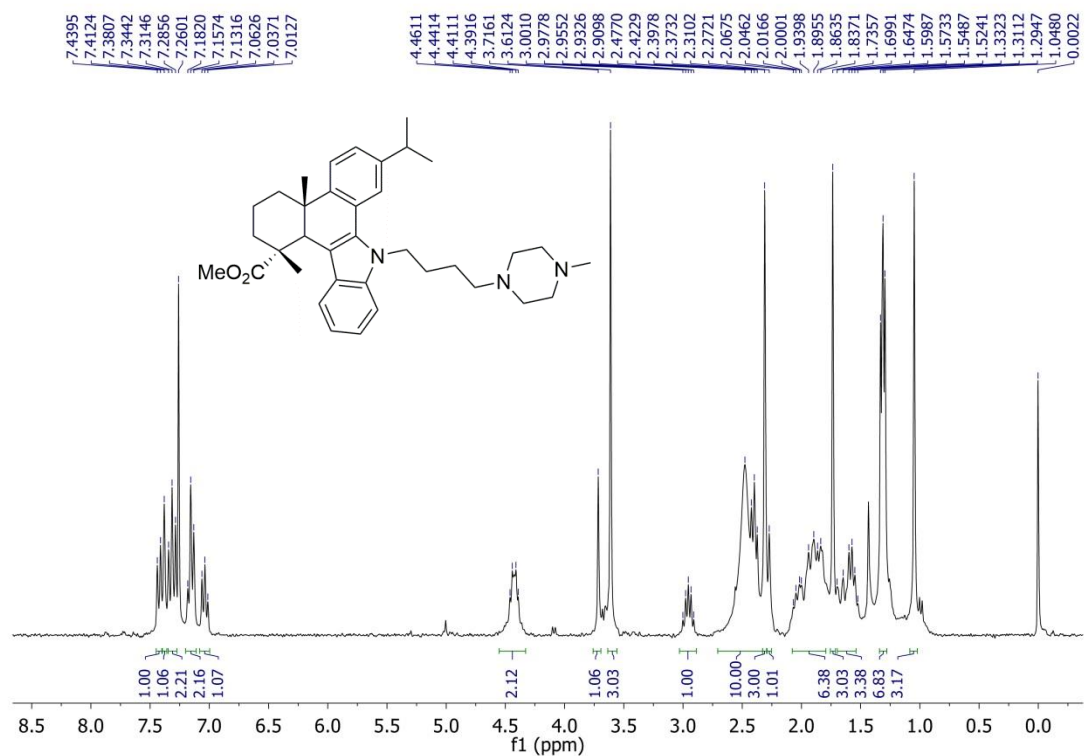

Fig. S35. <sup>1</sup>H-NMR spectrum of compound **8b** (300 MHz, CDCl<sub>3</sub>)

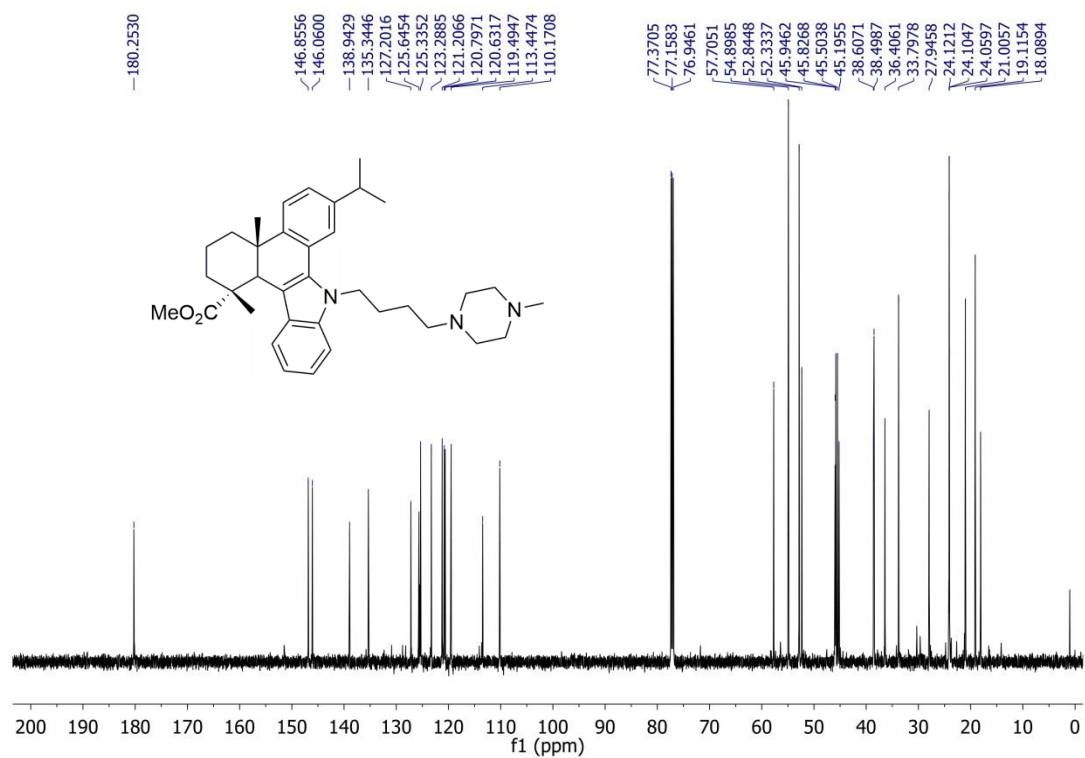

Fig. S36. <sup>13</sup>C-NMR spectrum of compound **8b** (150 MHz, CDCl<sub>3</sub>)

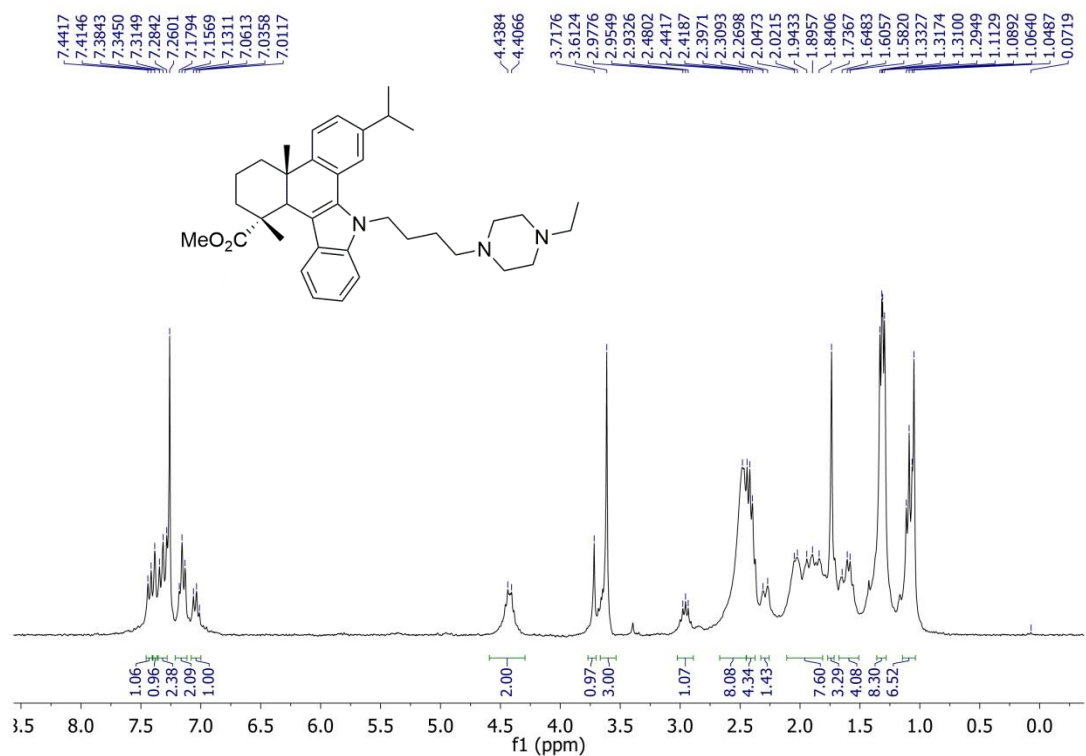

Fig. S37. <sup>1</sup>H-NMR spectrum of compound **8c** (300 MHz, CDCl<sub>3</sub>)

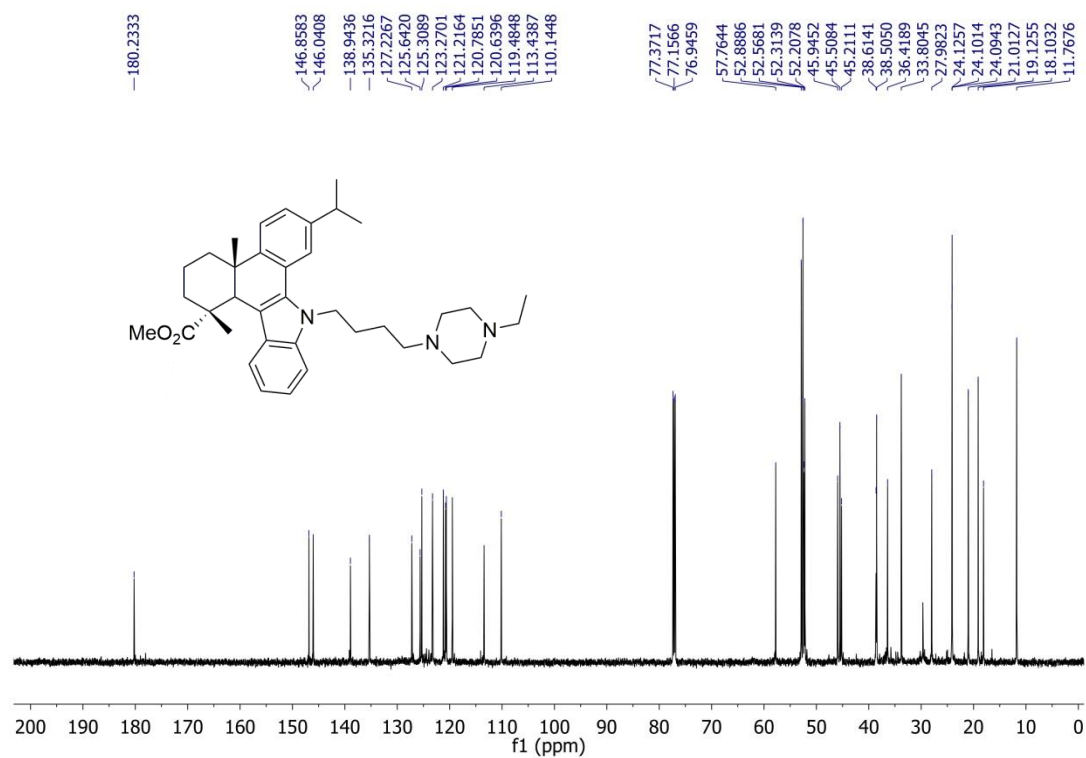

Fig. S38. <sup>13</sup>C-NMR spectrum of compound **8c** (150 MHz, CDCl<sub>3</sub>)

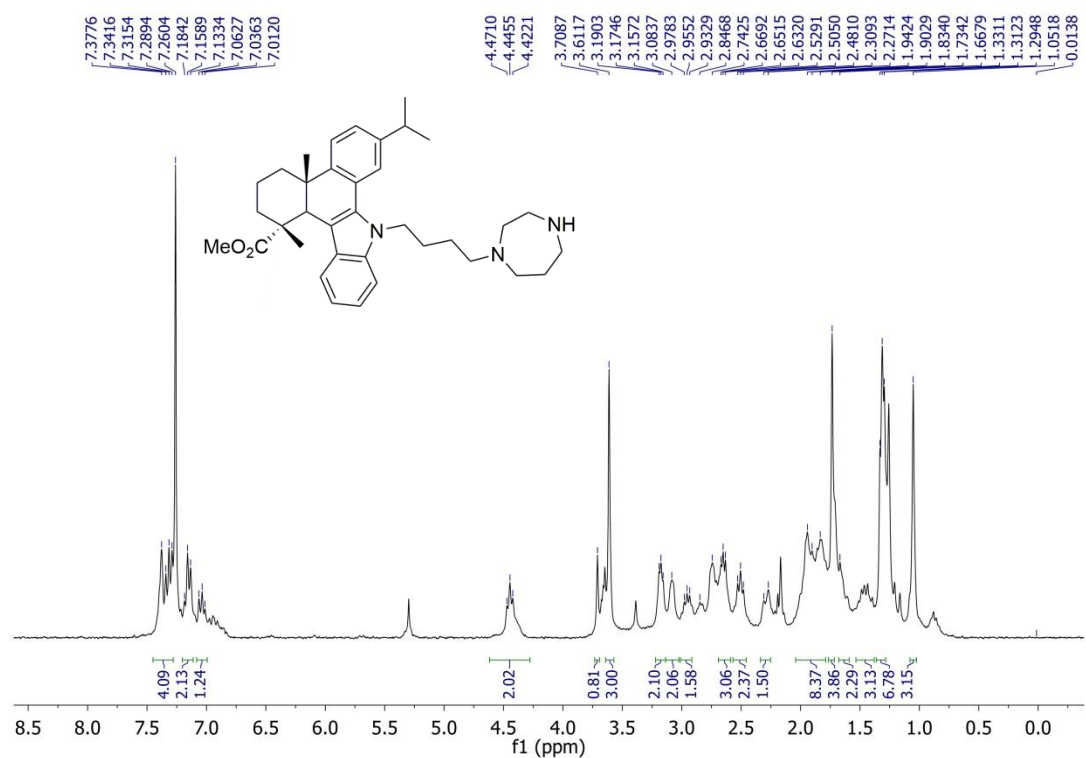

**Fig. S39.** <sup>1</sup>H-NMR spectrum of compound **8d** (300 MHz, CDCl<sub>3</sub>)

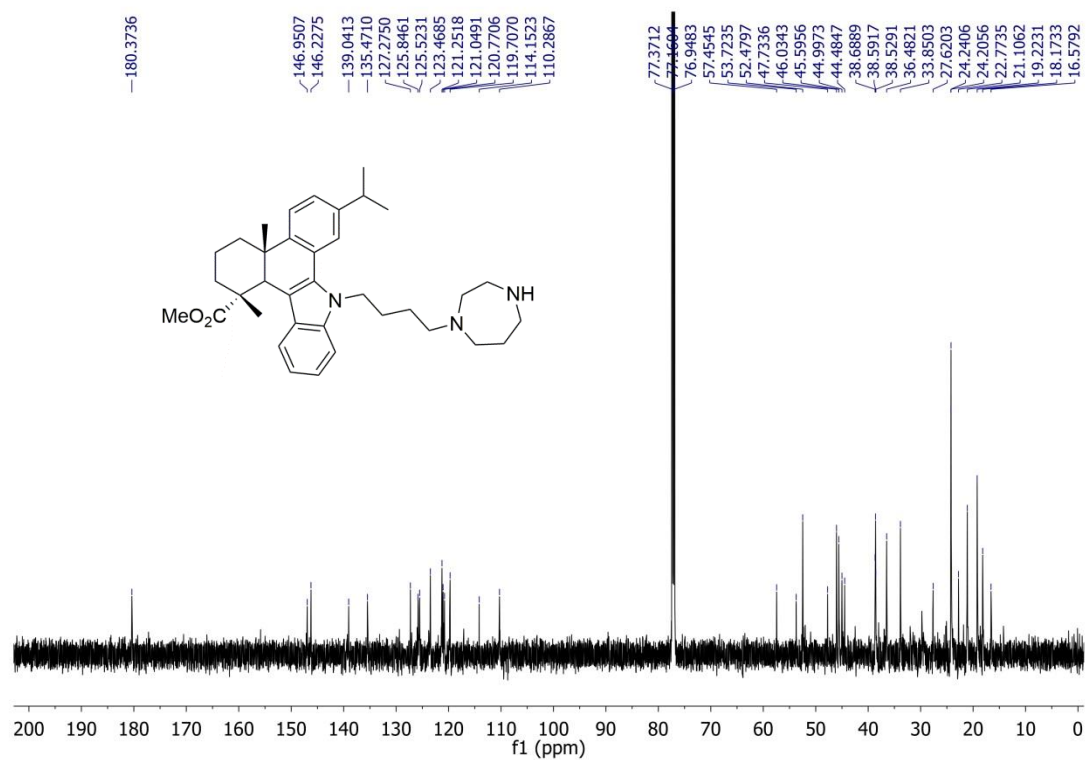

**Fig. S40.** <sup>13</sup>C-NMR spectrum of compound **8d** (150 MHz, CDCl<sub>3</sub>)

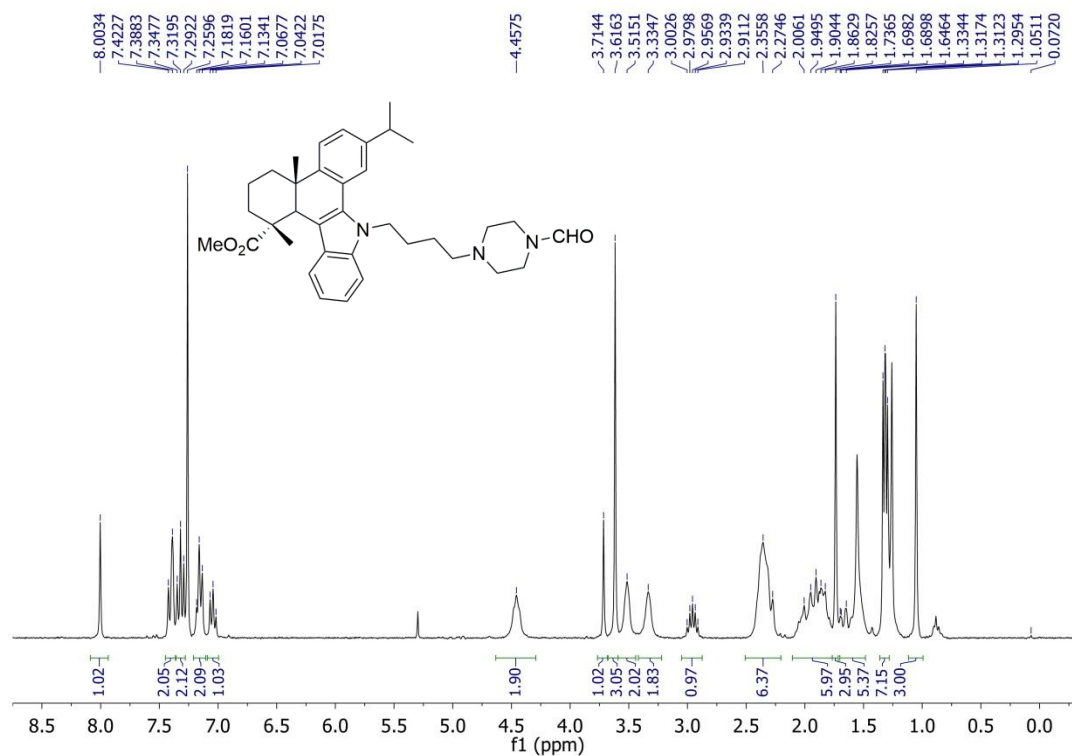

**Fig. S41.** <sup>1</sup>H-NMR spectrum of compound **8e** (300 MHz, CDCl<sub>3</sub>)

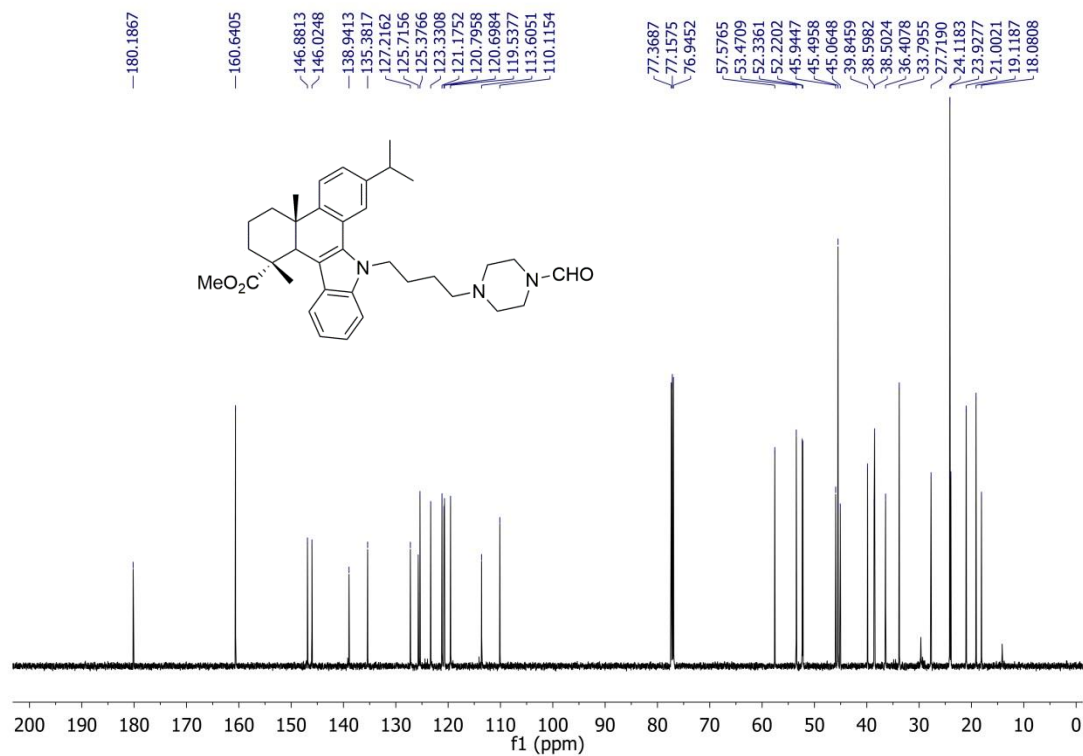

**Fig. S42.** <sup>13</sup>C-NMR spectrum of compound **8e** (150 MHz, CDCl<sub>3</sub>)



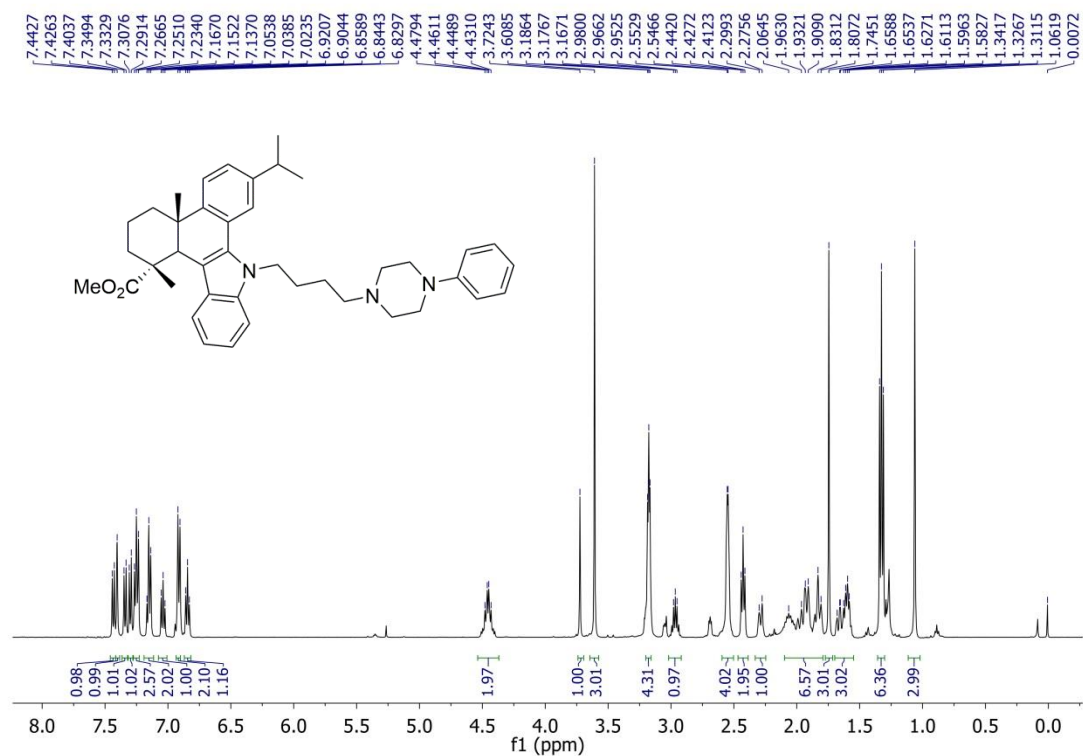

**Fig. S43.** <sup>1</sup>H-NMR spectrum of compound **8f** (500 MHz, CDCl<sub>3</sub>)

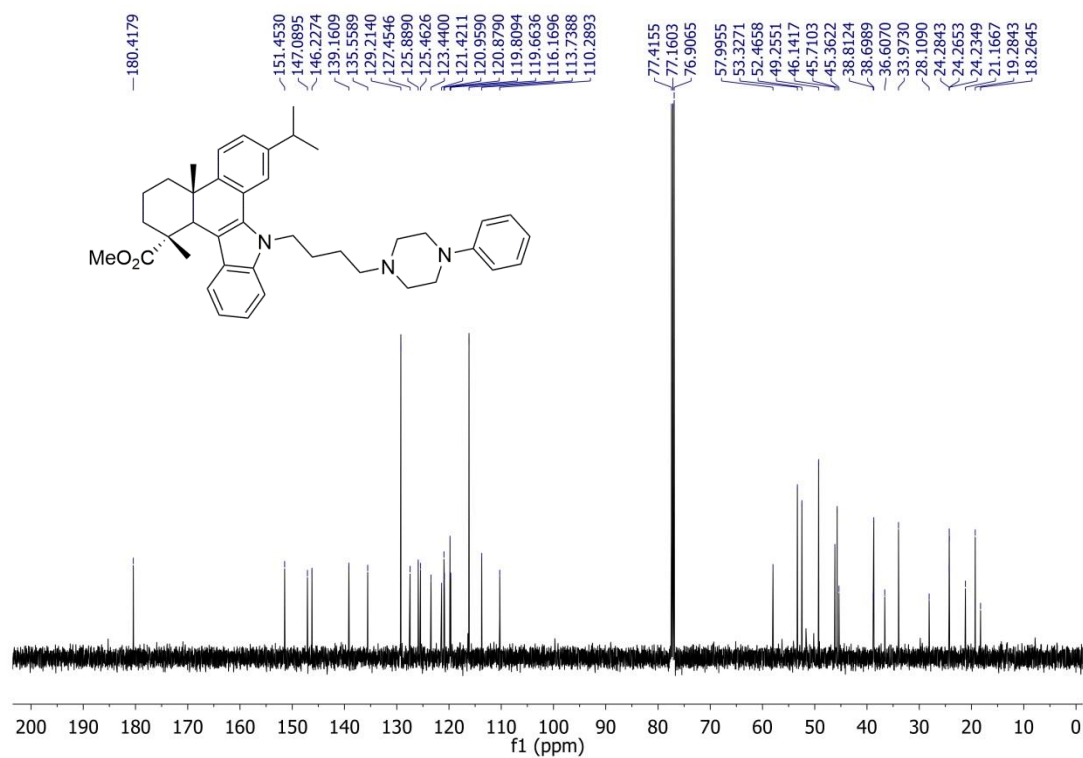

**Fig. S44.** <sup>13</sup>C-NMR spectrum of compound **8f** (125 MHz, CDCl<sub>3</sub>)

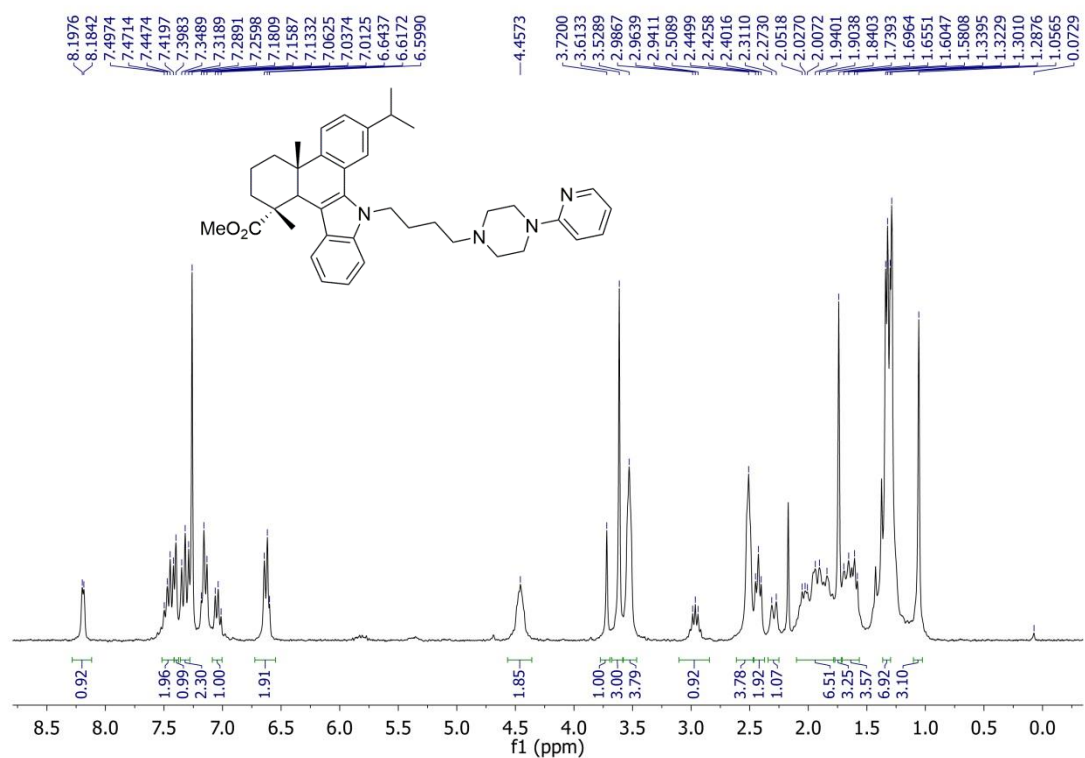

**Fig. S45.** <sup>1</sup>H-NMR spectrum of compound **8g** (300 MHz, CDCl<sub>3</sub>)

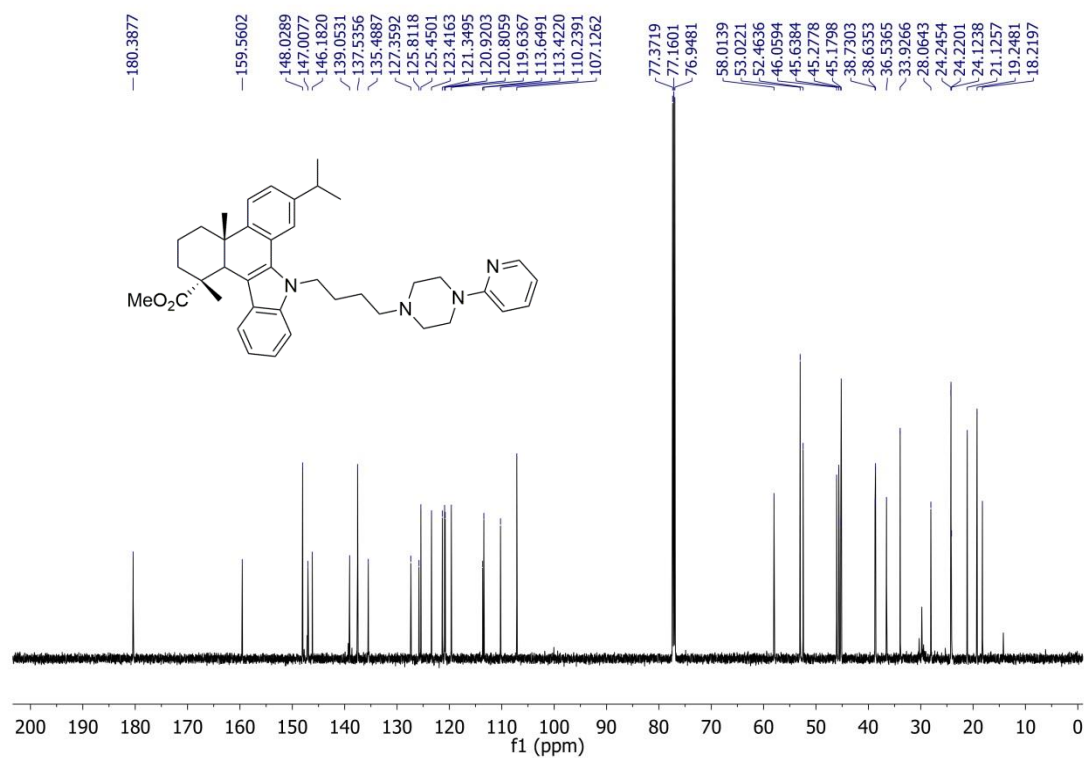

**Fig. S46.** <sup>13</sup>C-NMR spectrum of compound **8g** (150 MHz, CDCl<sub>3</sub>)

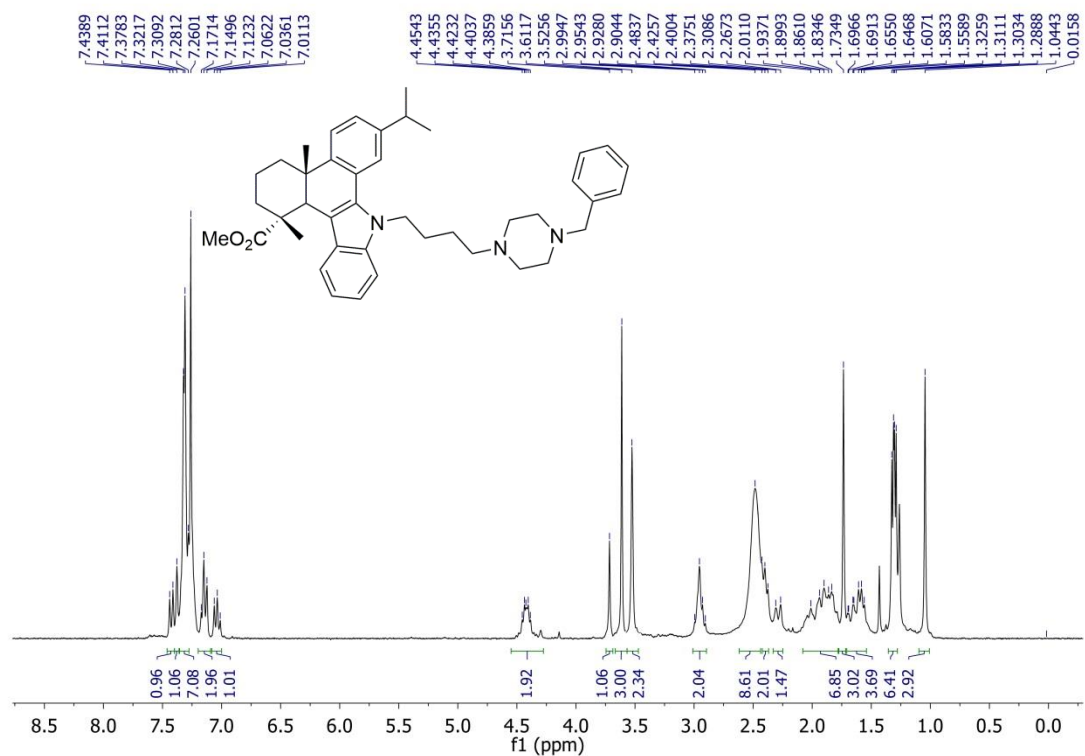

Fig. S47. <sup>1</sup>H-NMR spectrum of compound **8h** (300 MHz, CDCl<sub>3</sub>)

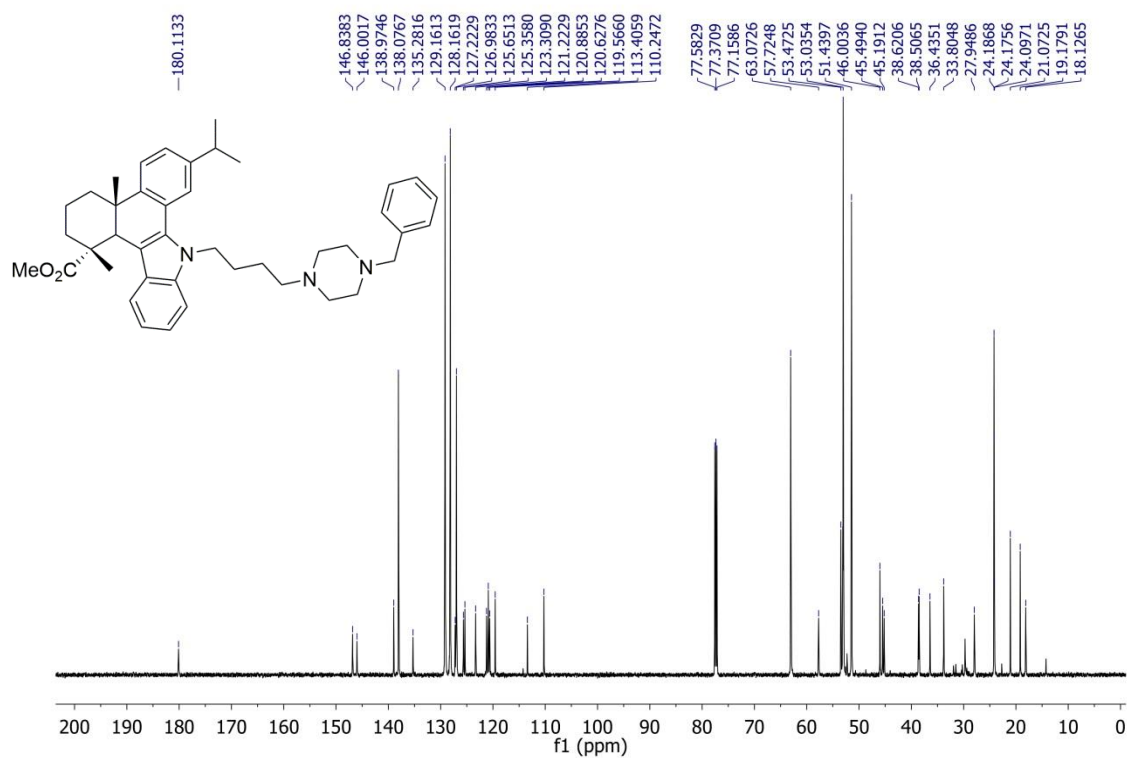

Fig. S48. <sup>13</sup>C-NMR spectrum of compound **8h** (150 MHz, CDCl<sub>3</sub>)

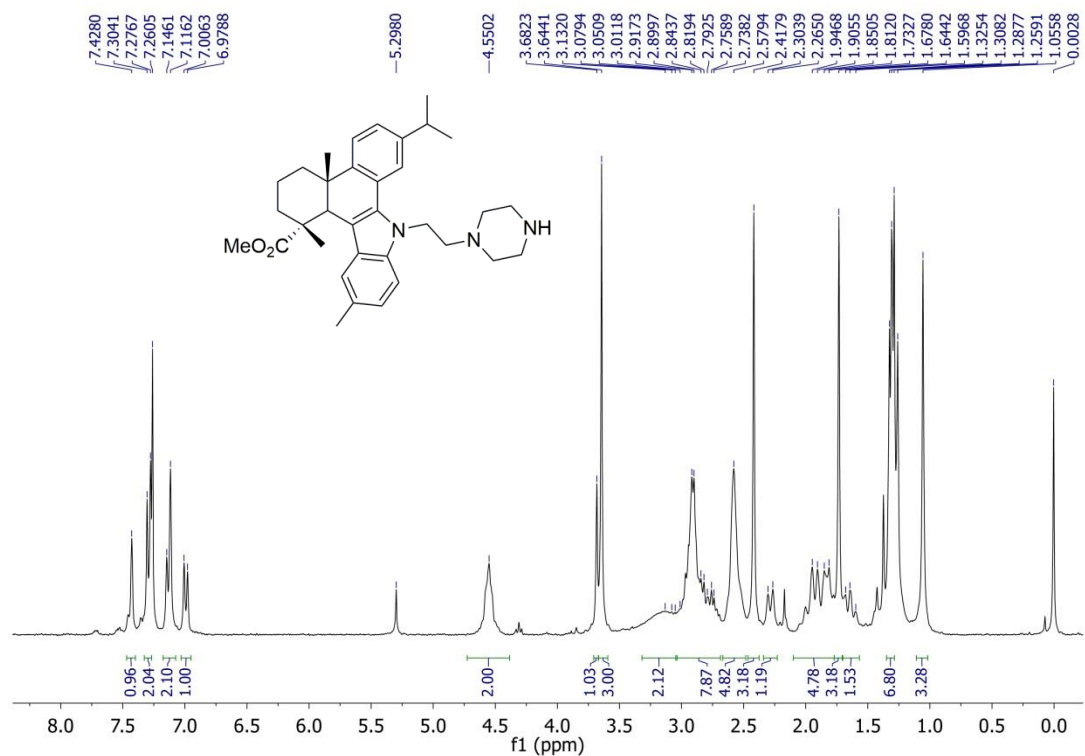

Fig. S49. <sup>1</sup>H-NMR spectrum of compound 10a (300 MHz, CDCl<sub>3</sub>)

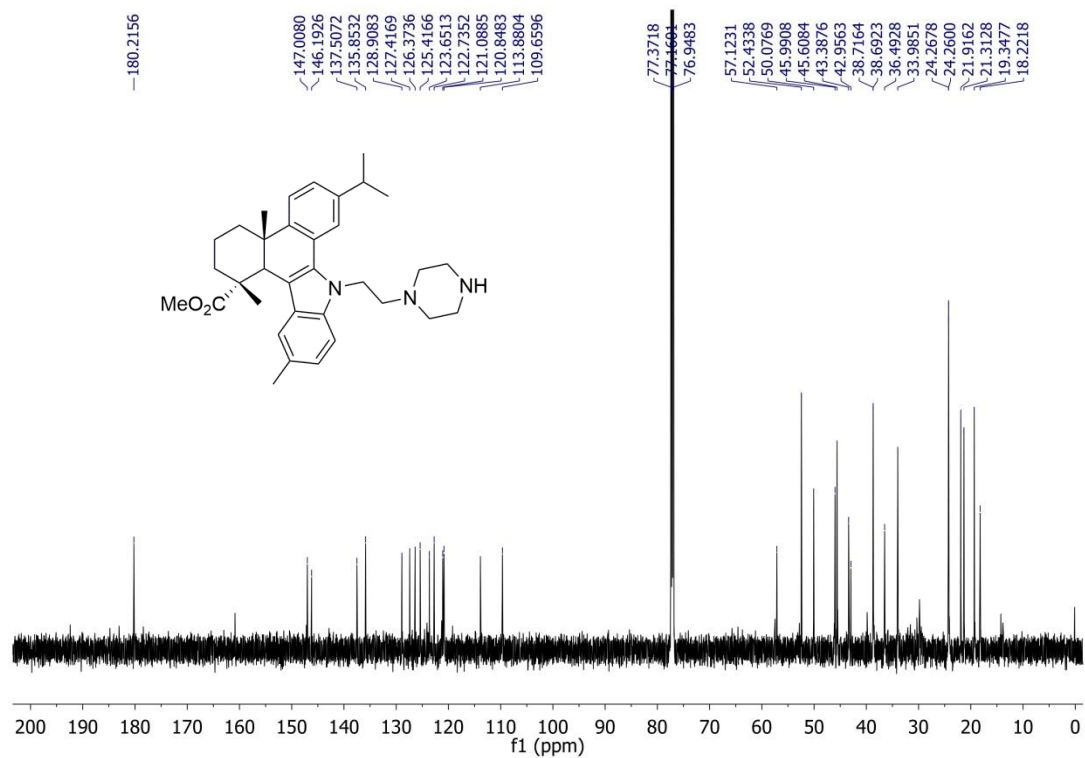

Fig. S50. <sup>13</sup>C-NMR spectrum of compound 10a (150 MHz, CDCl<sub>3</sub>)

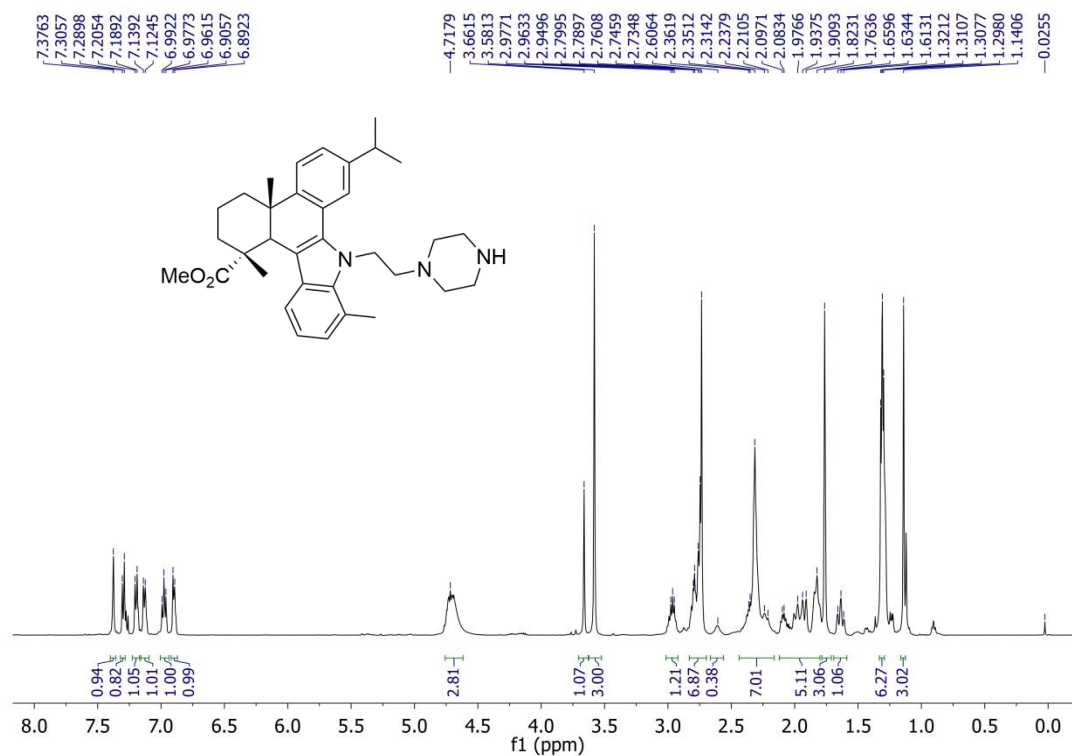

**Fig. S51.** <sup>1</sup>H-NMR spectrum of compound **10b** (500 MHz, CDCl<sub>3</sub>)

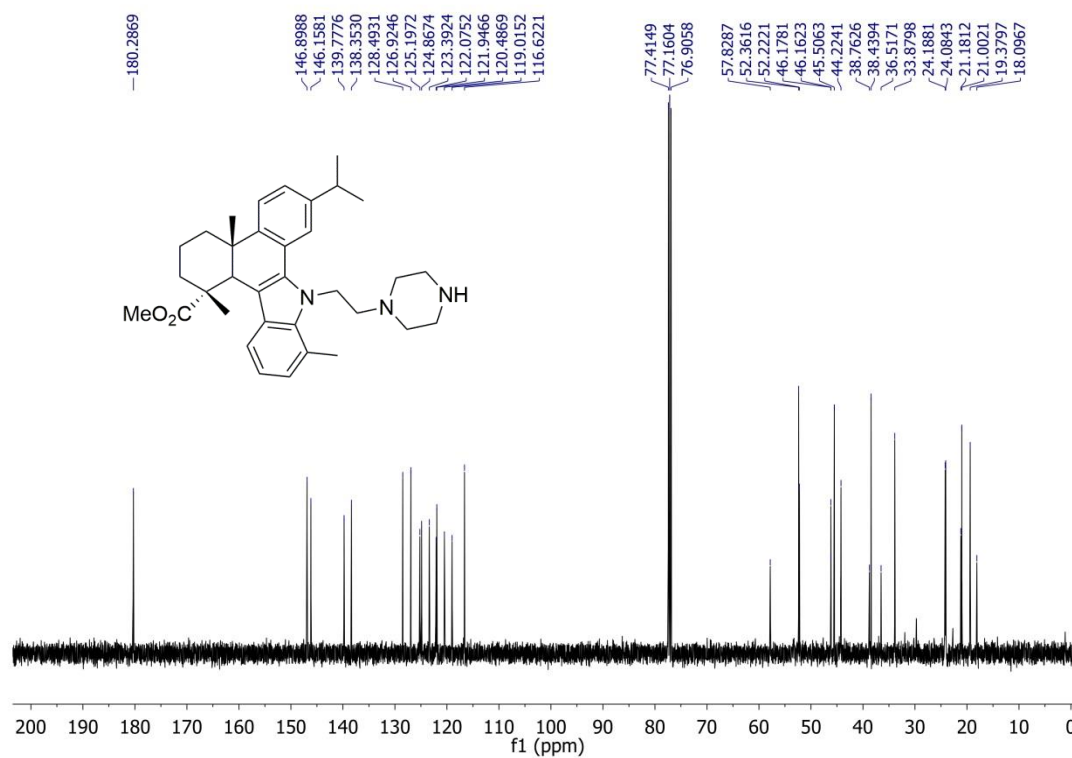

**Fig. S52.** <sup>13</sup>C-NMR spectrum of compound **10b** (125 MHz, CDCl<sub>3</sub>)

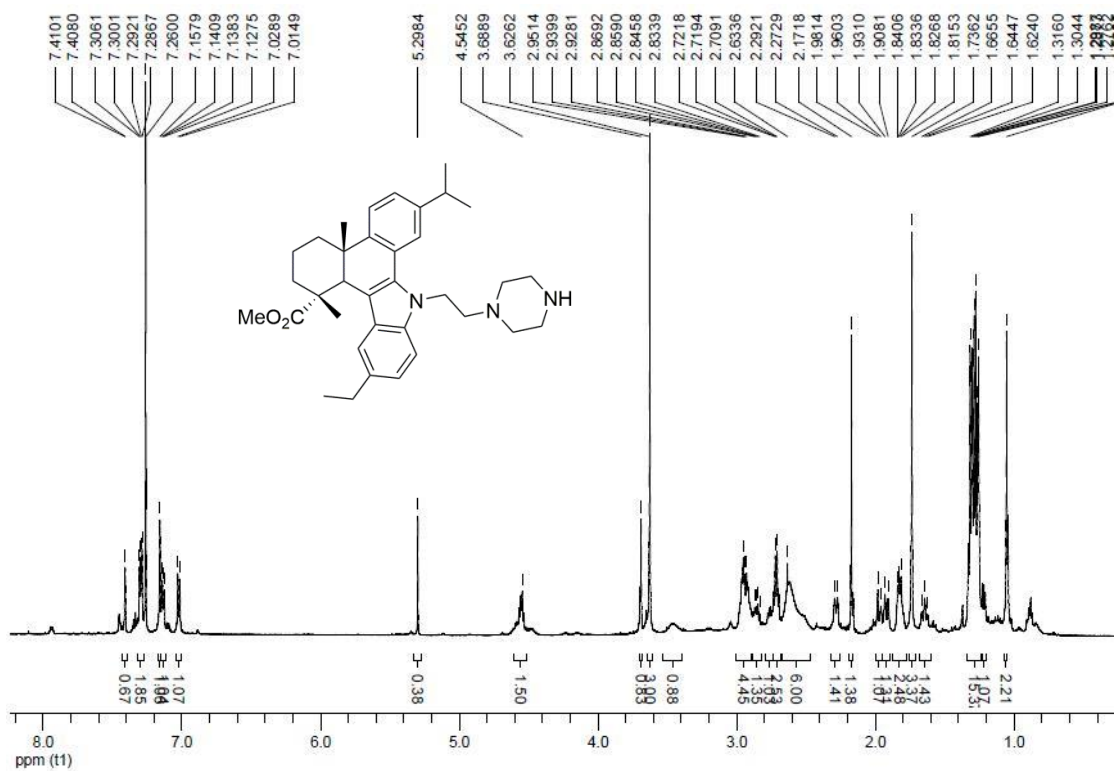

**Fig. S53.** <sup>1</sup>H-NMR spectrum of compound **10c** (600 MHz, CDCl<sub>3</sub>)

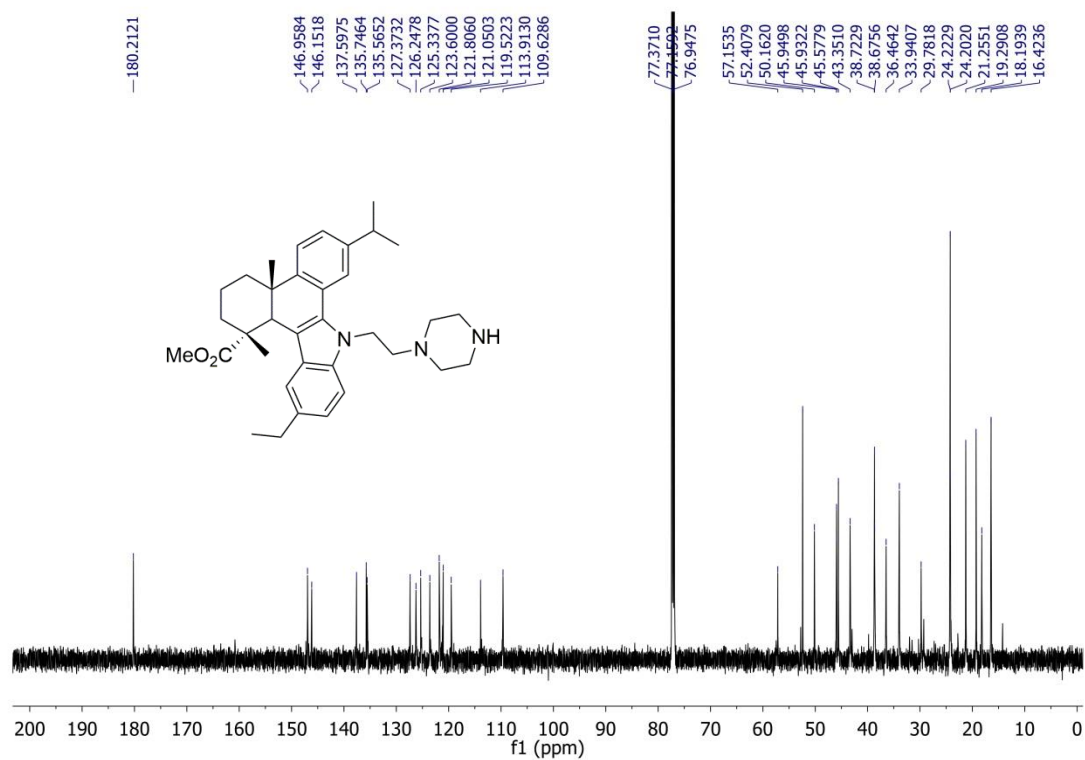

**Fig. S54.** <sup>13</sup>C-NMR spectrum of compound **10c** (150 MHz, CDCl<sub>3</sub>)



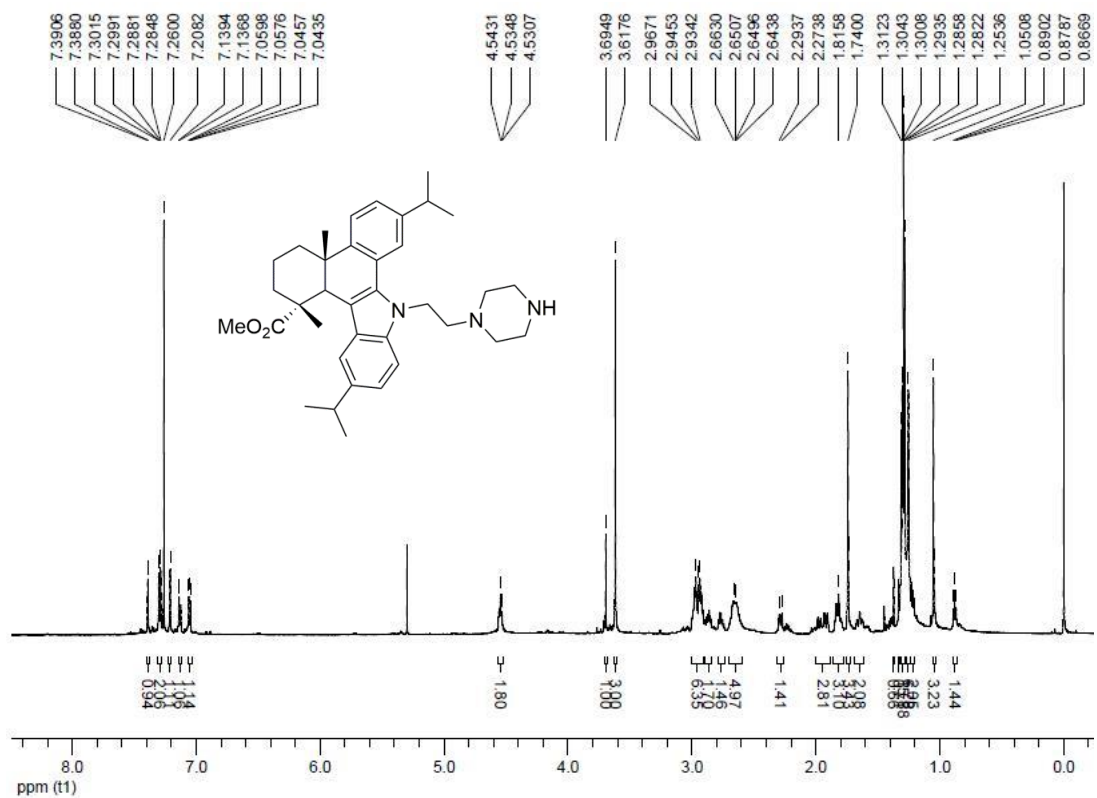

**Fig. S55.** <sup>1</sup>H-NMR spectrum of compound **10d** (600 MHz, CDCl<sub>3</sub>)

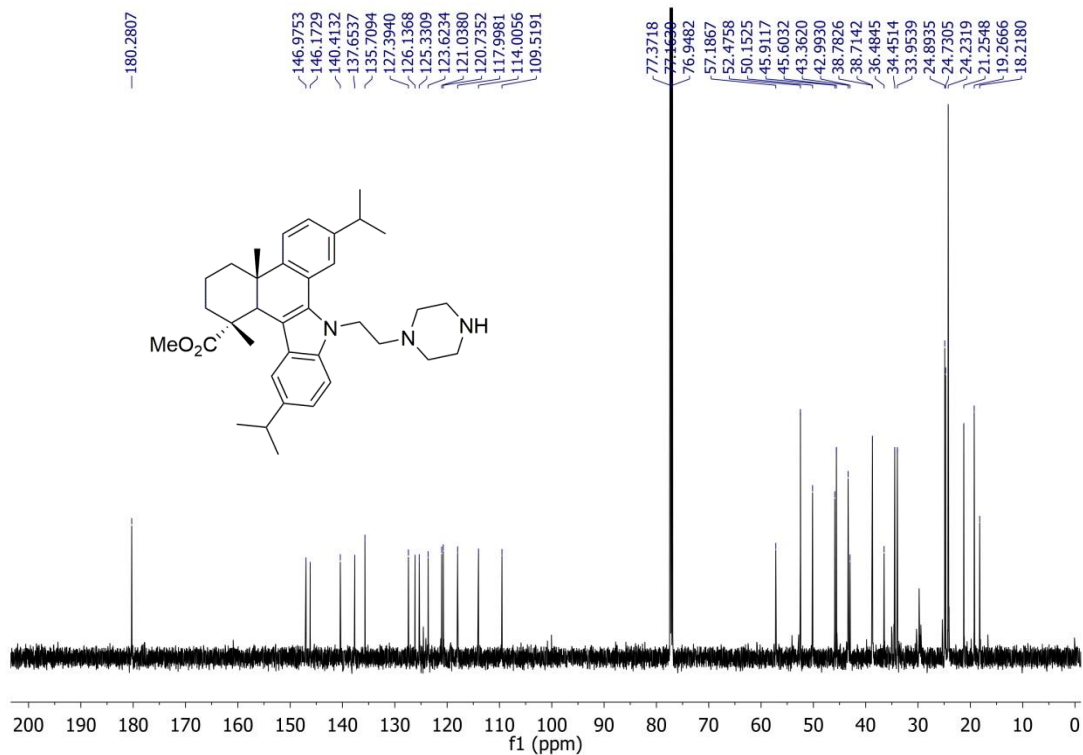



**Fig. S56.**  $^{13}\text{C}$ -NMR spectrum of compound **10d** (150 MHz,  $\text{CDCl}_3$ )

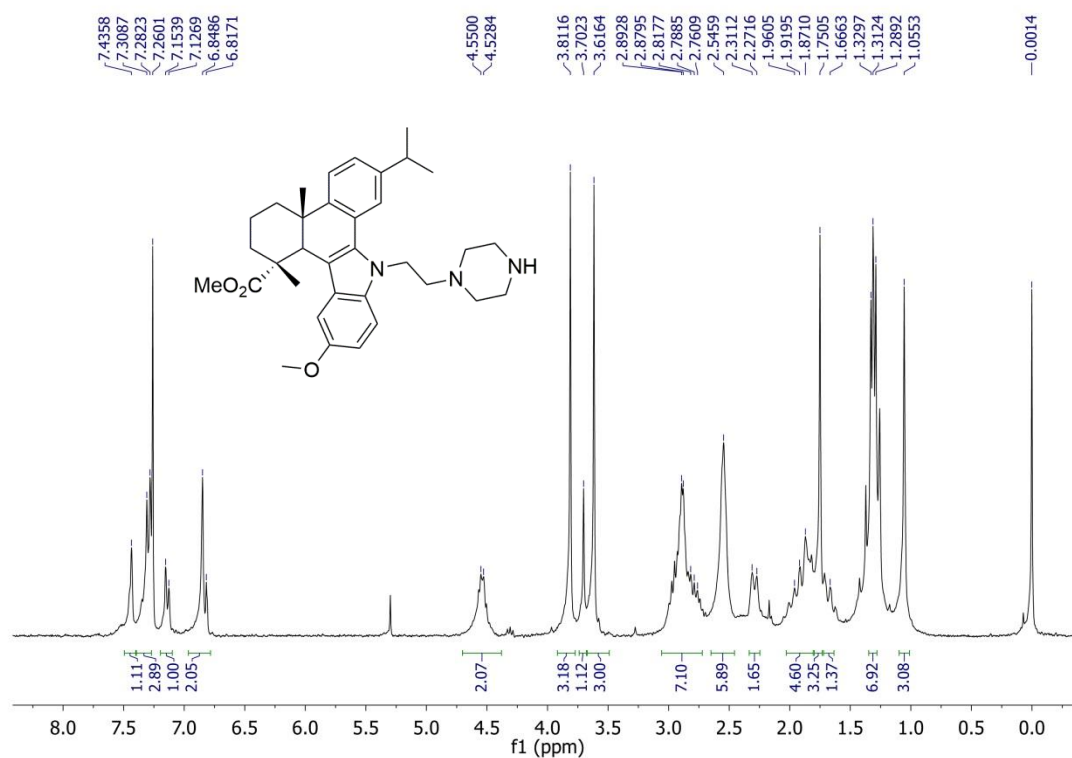

**Fig. S57.**  $^1\text{H}$ -NMR spectrum of compound **10e** (300 MHz,  $\text{CDCl}_3$ )

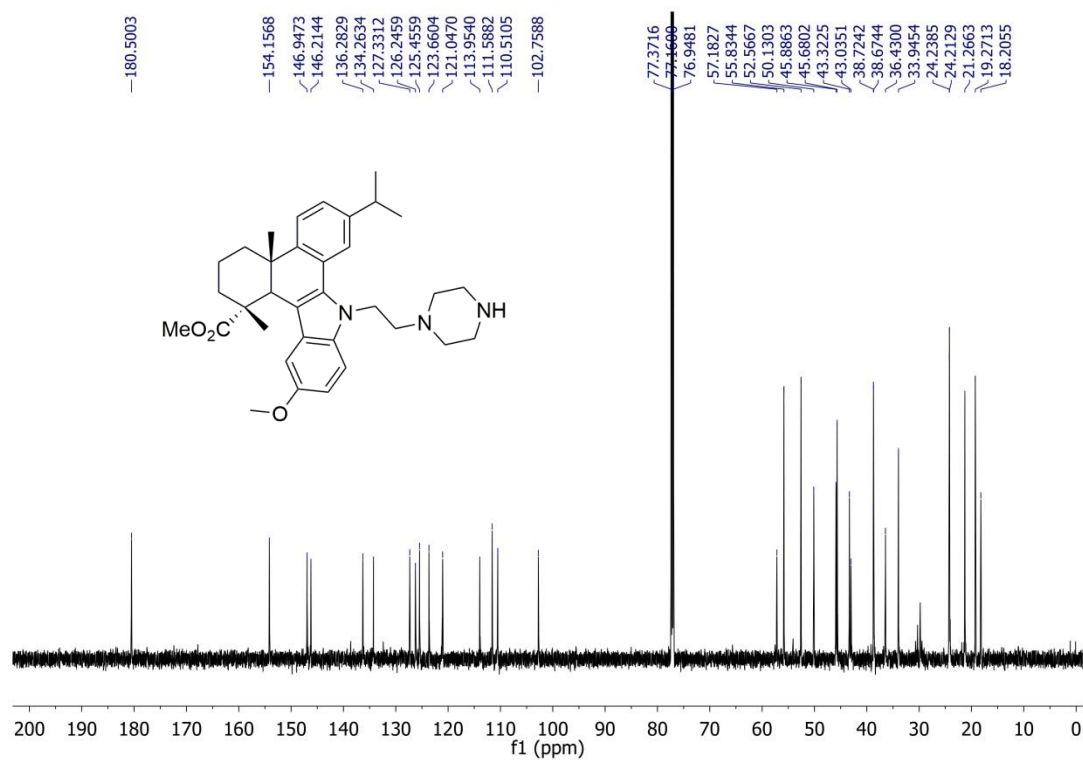

**Fig. S58.**  $^{13}\text{C}$ -NMR spectrum of compound **10e** (150 MHz,  $\text{CDCl}_3$ )

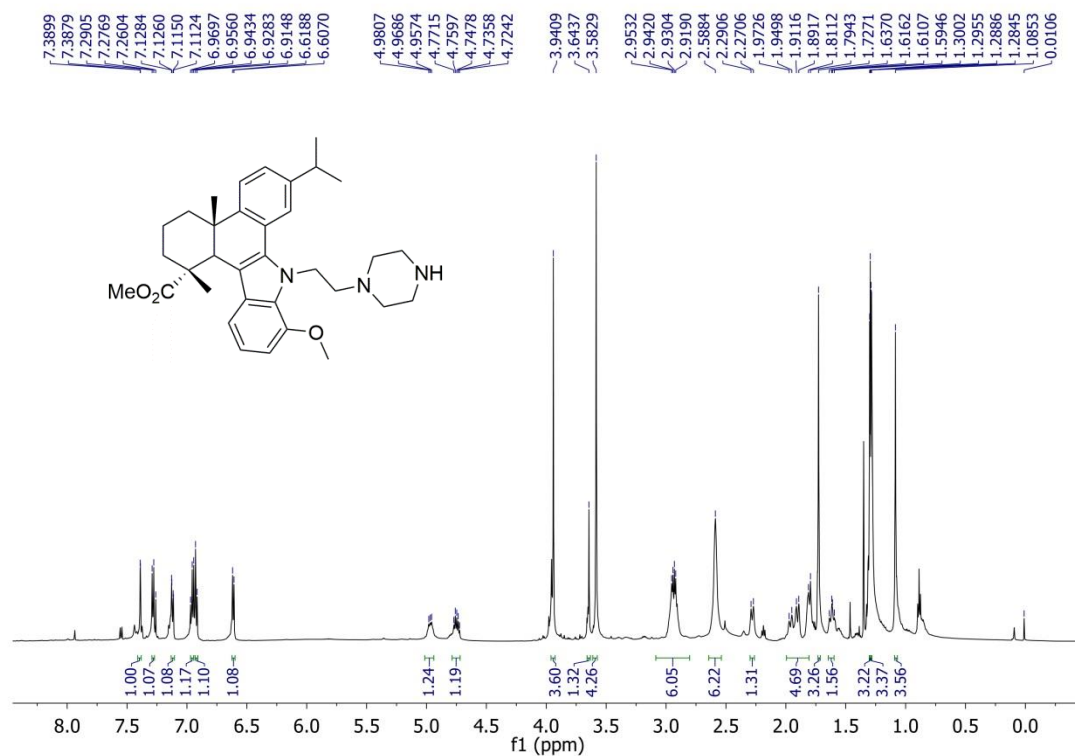

Fig. S59. <sup>1</sup>H-NMR spectrum of compound 10f (600 MHz, CDCl<sub>3</sub>)

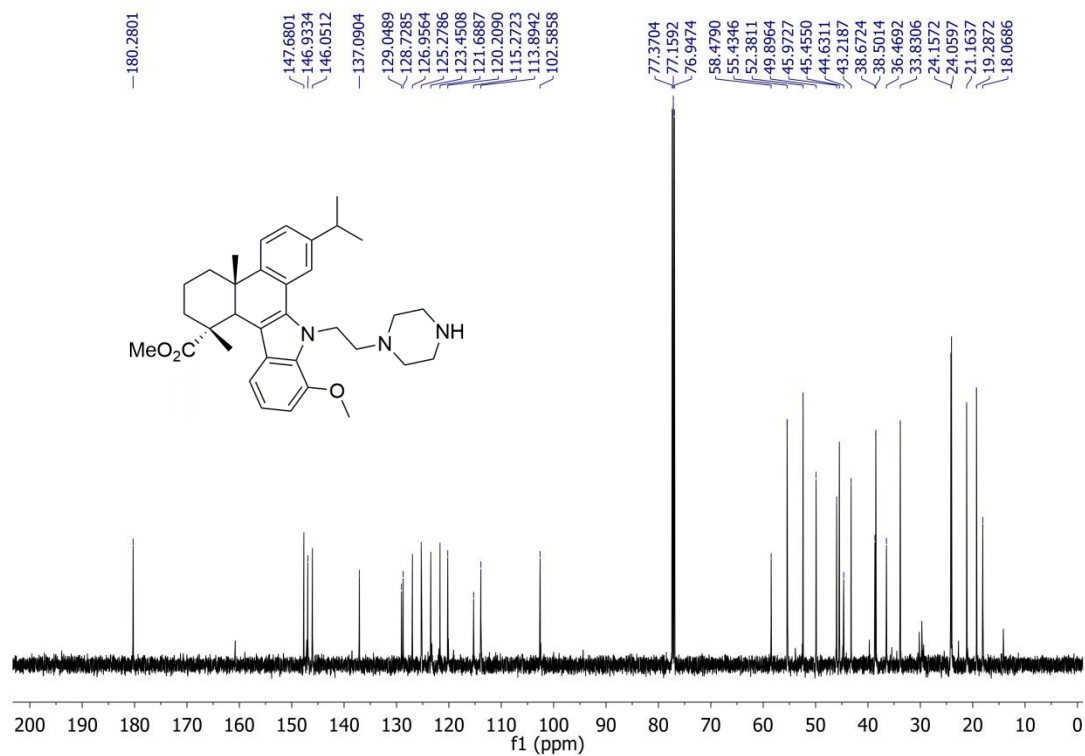

Fig. S60. <sup>13</sup>C-NMR spectrum of compound 10f (150 MHz, CDCl<sub>3</sub>)

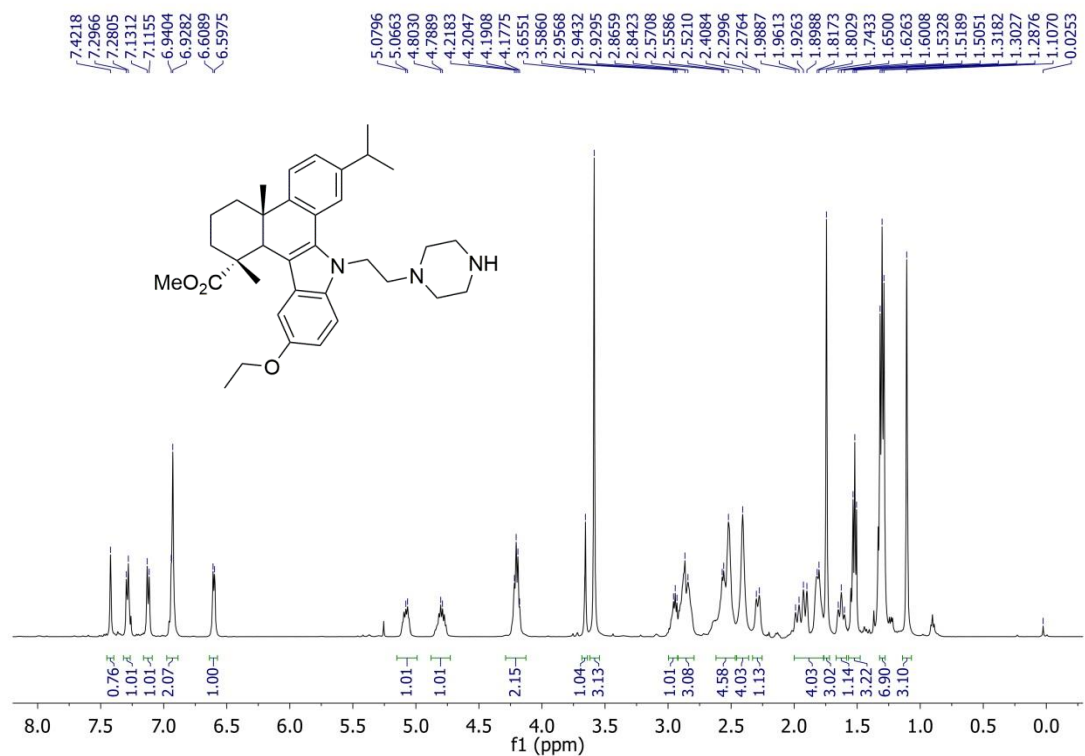

**Fig. S61.** <sup>1</sup>H-NMR spectrum of compound **10g** (500 MHz, CDCl<sub>3</sub>)

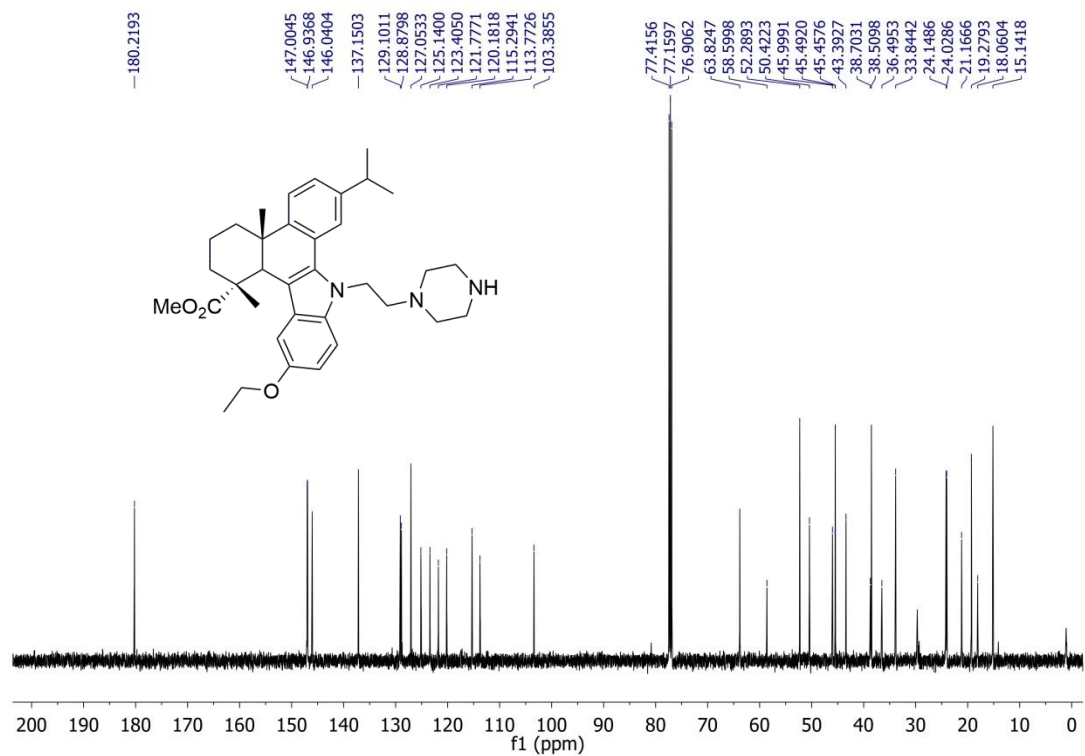

**Fig. S62.** <sup>13</sup>C-NMR spectrum of compound **10g** (125 MHz, CDCl<sub>3</sub>)

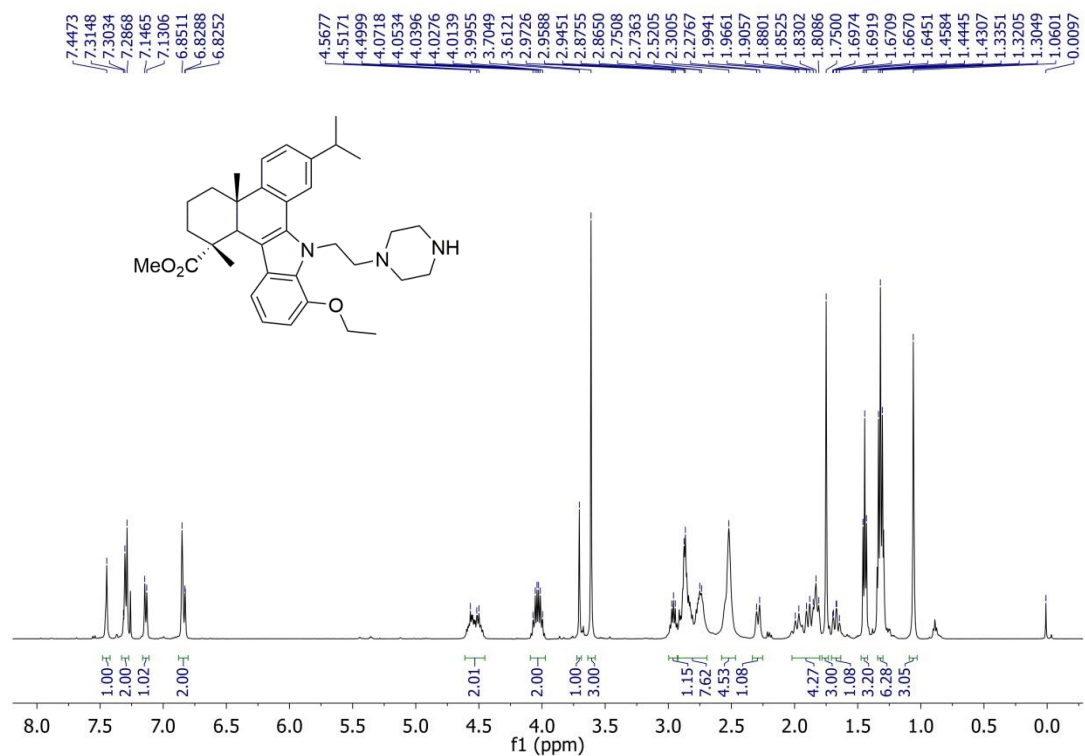

Fig. S63. <sup>1</sup>H-NMR spectrum of compound 10h (500 MHz, CDCl<sub>3</sub>)

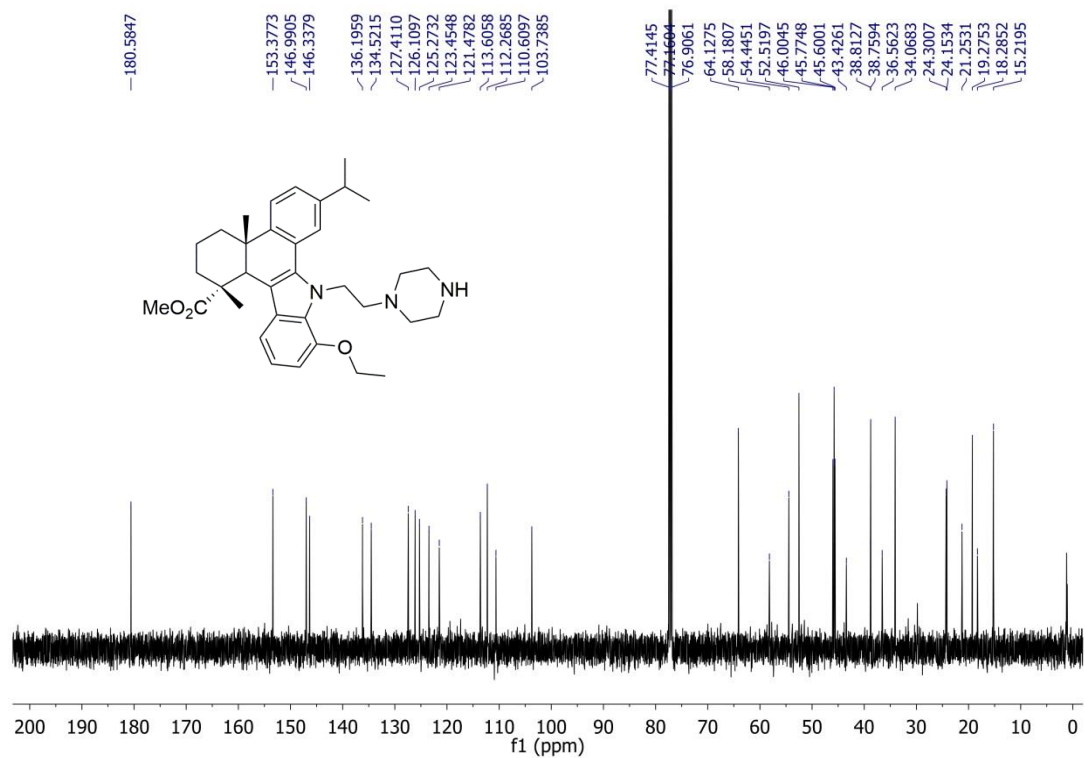

Fig. S64. <sup>13</sup>C-NMR spectrum of compound 10h (125 MHz, CDCl<sub>3</sub>)

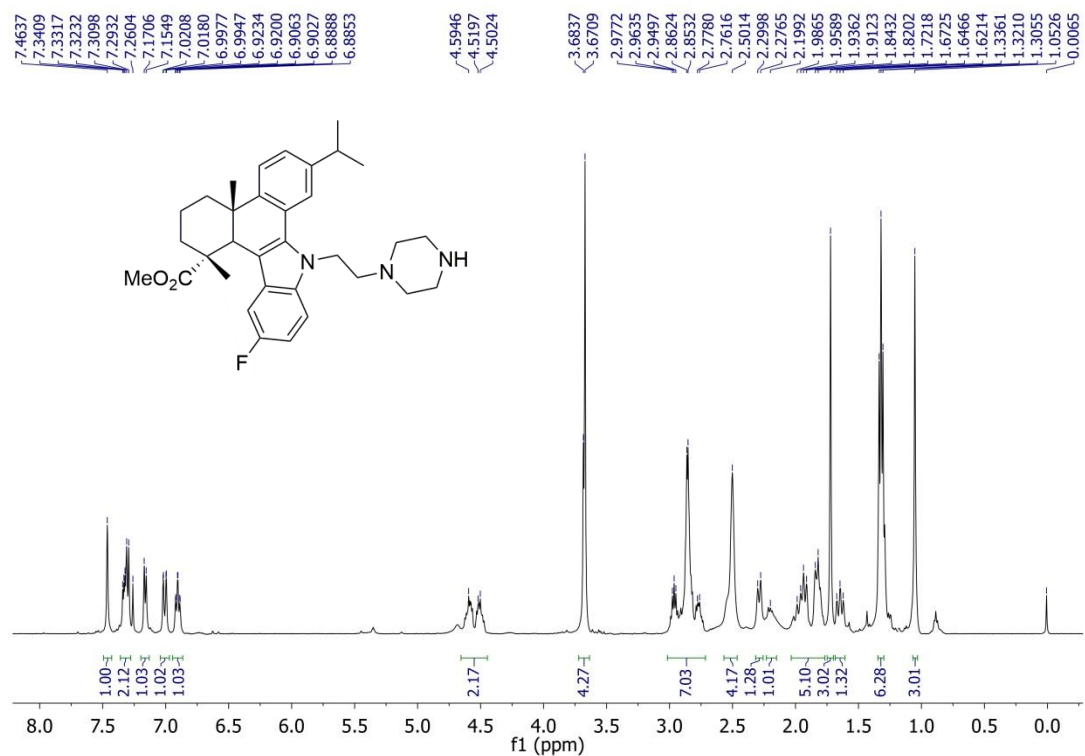

**Fig. S65.** <sup>1</sup>H-NMR spectrum of compound **10i** (500 MHz, CDCl<sub>3</sub>)

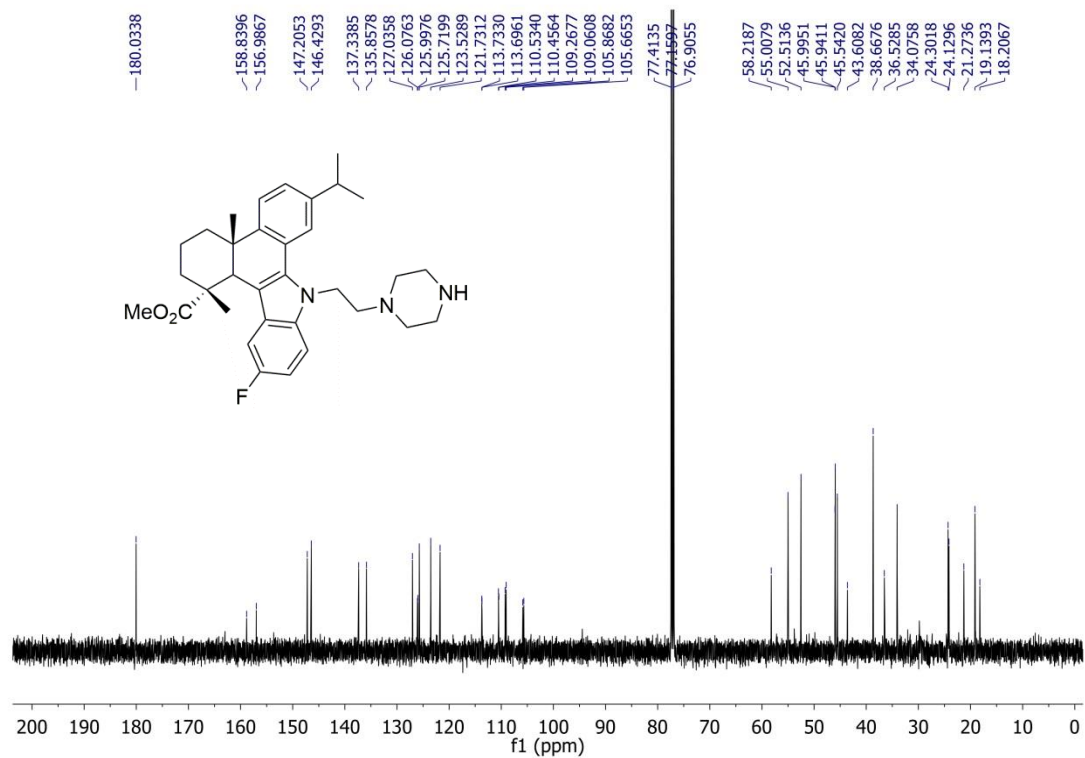

**Fig. S66.** <sup>13</sup>C-NMR spectrum of compound **10i** (125 MHz, CDCl<sub>3</sub>)

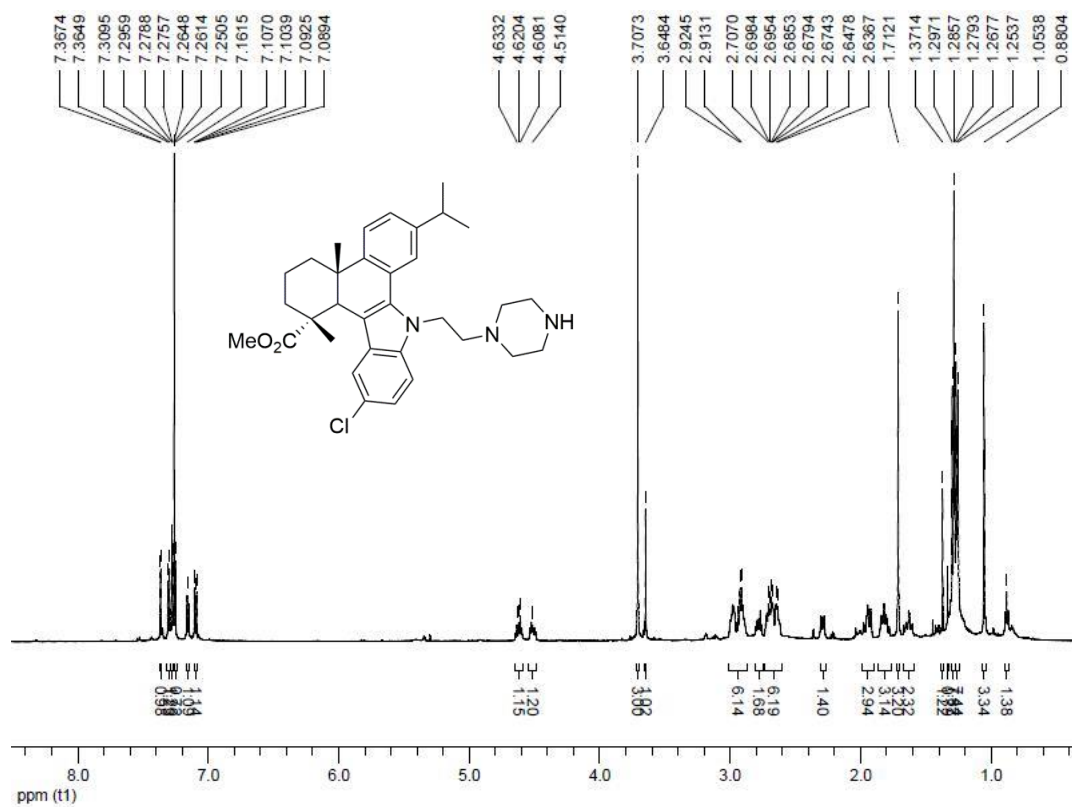

Fig. S67. <sup>1</sup>H-NMR spectrum of compound **10j** (600 MHz, CDCl<sub>3</sub>)

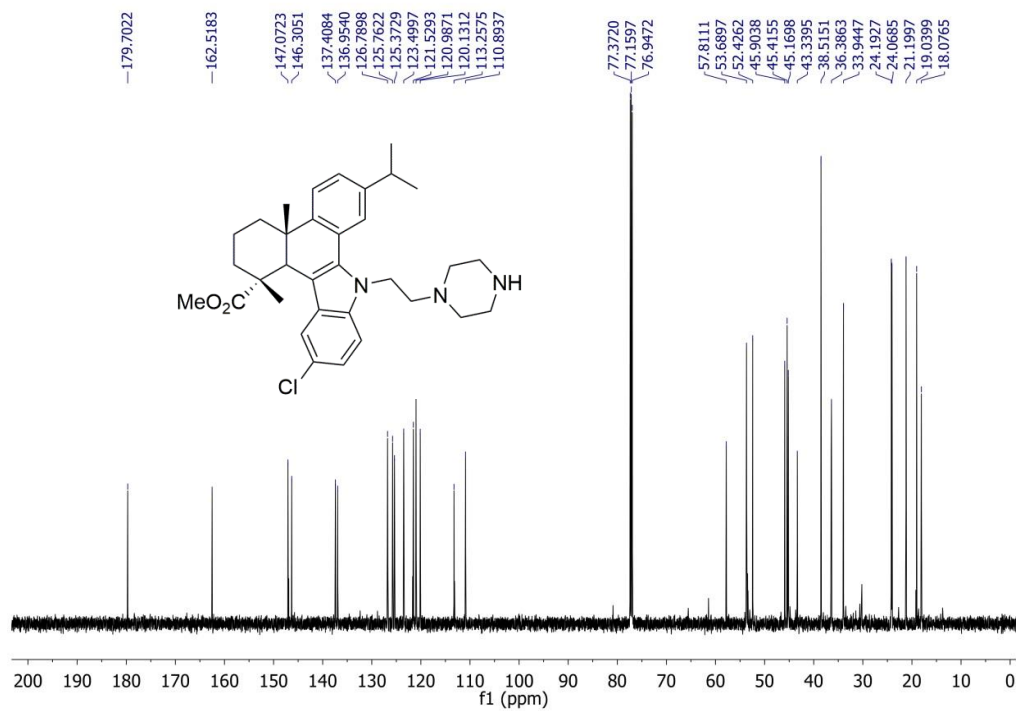

Fig. S68. <sup>13</sup>C-NMR spectrum of compound **10j** (150 MHz, CDCl<sub>3</sub>)
